# Supplementary material for: Predicting coated-nanoparticle drug release systems with perturbation-theory machine learning (PTML) models
Source: Royal Society of Chemistry journal article supplement (doi:10.1039/d0nr01849j), 2020-01-01
Supplement: d0nr01849j1.pdf [file d0nr01849j1.pdf]

**Predicting Coated-Nanoparticle Drugs Release Systems with  
Perturbation-Theory Machine Learning (PTML) Models  
SUPPORTING INFORMATION**

Ricardo Santana <sup>a,b,c,\*</sup>, Robin Zuluaga <sup>d</sup>, Piedad Gañán <sup>c</sup>, Sonia Arrasate <sup>e</sup>,  
Enrique Onieva <sup>a</sup>, and Humbert González-Díaz <sup>d,e,\*</sup>

<sup>a</sup>*DeustoTech-Fundación Deusto, Avda. Universidades, 24, 48007 Bilbao, Spain.*

<sup>b</sup>*Faculty of Engineering, University of Deusto, Avda. Universidades, 24, 48007 Bilbao, Spain.*

<sup>c</sup>*Facultad de Ingeniería Química, Universidad Pontificia Bolivariana, Circular 1° N° 70-01, Medellín, Colombia.*

<sup>d</sup>*Facultad de Ingeniería Agroindustrial, Universidad Pontificia Bolivariana, Circular 1° N° 70-01, Medellín, Colombia.*

<sup>e</sup>*Department of Organic Chemistry II, University of Basque Country UPV/EHU, 48940, Leioa, Spain.*

<sup>f</sup>*IKERBASQUE, Basque Foundation for Science, 48011, Bilbao, Spain.*

**Table S1.** Nanoparticle Moving Average values (full list)

| $c_{0np}$                     | $n_{np}$ | $nc_{0np}$ | $\langle D_{1core}(c_{0np}) \rangle$ | $\langle D_{1coat}(c_{0np}) \rangle$ | $\langle D_{2coat}(c_{0np}) \rangle$ | $\langle D_{2core}(c_{0np}) \rangle$ | $\langle D_{4coat}(c_{0np}) \rangle$ | $\langle D_{3coat}(c_{0np}) \rangle$ |
|-------------------------------|----------|------------|--------------------------------------|--------------------------------------|--------------------------------------|--------------------------------------|--------------------------------------|--------------------------------------|
| EC50 (uM)                     | 30       | 25422      | 51.13                                | 6.54                                 | 0.18                                 | 2.48                                 | 53.16                                | 17.57                                |
| IC50 (uM)p                    | 29       | 18714      | 0.28                                 | 7.94                                 | 0.55                                 | 2.36                                 | 74.56                                | 11.77                                |
| CC50 (uM)                     | 113      | 3099       | 21.44                                | 17.17                                | 0.30                                 | 2.54                                 | 72.26                                | 6.07                                 |
|                               | 172      |            |                                      |                                      |                                      |                                      |                                      |                                      |
| $c_{1np}$                     | $n_{np}$ | $nc_{1np}$ | $\langle D_{1core}(c_{1np}) \rangle$ | $\langle D_{1coat}(c_{1np}) \rangle$ | $\langle D_{2coat}(c_{1np}) \rangle$ | $\langle D_{2core}(c_{1np}) \rangle$ | $\langle D_{4coat}(c_{1np}) \rangle$ | $\langle D_{3coat}(c_{1np}) \rangle$ |
| A549 (H)                      | 23       | 2319.24    | 0.04                                 | 6.22                                 | 0.00                                 | 2.72                                 | 0.00                                 | 0.00                                 |
| BMSC (H)                      | 2        | 16644.5    | 0.50                                 | 71.47                                | 0.00                                 | 2.93                                 | 0.00                                 | 0.00                                 |
| BMSC (M)                      | 2        | 16644.5    | 0.50                                 | 71.47                                | 0.00                                 | 2.93                                 | 0.00                                 | 0.00                                 |
| HEK293 (H)                    | 3        | 11255.7    | 0.33                                 | 47.65                                | 0.00                                 | 2.80                                 | 0.00                                 | 0.00                                 |
| HepG2 (H)                     | 15       | 2566.61    | 0.47                                 | 27.71                                | 0.60                                 | 2.52                                 | 129.51                               | 17.07                                |
| HUVECs                        | 3        | 11246.2    | 0.33                                 | 47.65                                | 0.00                                 | 2.80                                 | 0.00                                 | 0.00                                 |
| NCIH441 (H)                   | 4        | 8699.74    | 0.25                                 | 35.74                                | 0.00                                 | 2.85                                 | 0.00                                 | 0.00                                 |
| RAW 264.7 (M)                 | 2        | 16644.5    | 0.50                                 | 71.47                                | 0.00                                 | 2.93                                 | 0.00                                 | 0.00                                 |
| BRL 3A (R)                    | 4        | 3187.59    | 0.00                                 | 0.00                                 | 0.00                                 | 2.54                                 | 0.00                                 | 0.00                                 |
| L929 (M)                      | 3        | 6422.33    | 707.33                               | 3.89                                 | 0.33                                 | 2.75                                 | 33.01                                | 14.23                                |
| BJ (H)                        | 1        | 3923.11    | 0.00                                 | 0.00                                 | 0.00                                 | 2.71                                 | 0.00                                 | 0.00                                 |
| Neuro-2A (M)                  | 1        | 2504.19    | 0.00                                 | 0.00                                 | 0.00                                 | 2.81                                 | 0.00                                 | 0.00                                 |
| 3T3 (M)                       | 9        | 322.843    | 0.44                                 | 12.80                                | 0.89                                 | 2.36                                 | 120.13                               | 18.97                                |
| HaCaT (H)                     | 6        | 459.361    | 45.00                                | 0.00                                 | 1.16                                 | 2.43                                 | 160.50                               | 0.00                                 |
| H4IIE (R)                     | 4        | 629.465    | 0.00                                 | 0.00                                 | 0.00                                 | 1.95                                 | 0.00                                 | 0.00                                 |
| CaCo-2 (H)                    | 6        | 313.239    | 0.67                                 | 5.33                                 | 0.43                                 | 2.21                                 | 138.67                               | 10.97                                |
| Dendritic cells (M)           | 2        | 1000       | 0.00                                 | 0.00                                 | 0.00                                 | 2.78                                 | 0.00                                 | 0.00                                 |
| MDCK (H)                      | 2        | 870        | 0.00                                 | 0.00                                 | 0.00                                 | 2.78                                 | 0.00                                 | 0.00                                 |
| NR8383 (R)                    | 7        | 181.933    | 0.57                                 | 4.56                                 | 0.37                                 | 1.93                                 | 118.86                               | 9.40                                 |
| Precision-cut lung slices (R) | 1        | 540        | 0.00                                 | 0.00                                 | 0.00                                 | 2.78                                 | 0.00                                 | 0.00                                 |

|                                 |    |         |        |       |      |      |        |       |
|---------------------------------|----|---------|--------|-------|------|------|--------|-------|
| TK6 (H)                         | 2  | 260     | 0.00   | 0.00  | 0.00 | 2.78 | 0.00   | 0.00  |
| WISH (H)                        | 3  | 331.813 | 0.00   | 0.00  | 0.00 | 2.74 | 0.00   | 0.00  |
| HeLa (H)                        | 1  | 266.559 | 0.00   | 0.00  | 0.00 | 2.55 | 0.00   | 0.00  |
| RBE4 (R)                        | 2  | 162.235 | 1.00   | 28.79 | 2.00 | 1.93 | 270.28 | 42.68 |
| MDCK II (D)                     | 3  | 4.06159 | 1.00   | 91.87 | 0.00 | 2.54 | 624.95 | 0.00  |
| PK-15 (P)                       | 1  | 3.49805 | 0.00   | 0.00  | 0.00 | 2.54 | 0.00   | 0.00  |
| Vero (Mon)                      | 1  | 1.05601 | 0.00   | 0.00  | 0.00 | 2.54 | 0.00   | 0.00  |
| Saccharomyces cerevisiae        | 8  | 63045.4 | 0.25   | 9.42  | 0.40 | 2.49 | 61.58  | 15.17 |
| Vibrio fischeri                 | 4  | 62859.2 | 0.00   | 0.00  | 0.00 | 2.71 | 0.00   | 0.00  |
| Tetrahymena thermophila         | 4  | 941.469 | 0.00   | 0.00  | 0.00 | 2.62 | 0.00   | 0.00  |
| Desmodesmus subspicatus         | 2  | 513.36  | 0.00   | 0.00  | 0.00 | 2.81 | 0.00   | 0.00  |
| Chlorella sp.                   | 2  | 323.555 | 0.00   | 0.00  | 0.00 | 2.76 | 0.00   | 0.00  |
| Chlorella vulgaris              | 1  | 432.169 | 0.00   | 0.00  | 0.00 | 2.68 | 0.00   | 0.00  |
| Scenedesmus sp.                 | 2  | 325.69  | 0.00   | 0.00  | 0.00 | 2.76 | 0.00   | 0.00  |
| Pseudokirchneriella subcapitata | 7  | 46.6136 | 218.86 | 17.27 | 0.33 | 1.97 | 157.47 | 57.96 |
| Lycopersicon esculentum         | 16 | 31534.2 | 0.50   | 14.40 | 1.00 | 2.37 | 135.14 | 21.34 |
| Brassica napus                  | 6  | 2087.86 | 0.00   | 0.00  | 0.00 | 2.40 | 0.00   | 0.00  |
| Cucumis sativus                 | 2  | 6038.73 | 0.00   | 0.00  | 0.00 | 2.59 | 0.00   | 0.00  |
| Raphanus sativus                | 3  | 4332.91 | 0.00   | 0.00  | 0.00 | 2.29 | 0.00   | 0.00  |
| Lolium perenne                  | 2  | 275.72  | 0.00   | 0.00  | 0.00 | 2.10 | 0.00   | 0.00  |

| $c_{2np}$        | $n_{np}$ | $nc_{2np}$ | $\langle D_{1core}(c_{2np}) \rangle$ | $\langle D_{1coat}(c_{2np}) \rangle$ | $\langle D_{2coat}(c_{2np}) \rangle$ | $\langle D_{2core}(c_{2np}) \rangle$ | $\langle D_{4coat}(c_{2np}) \rangle$ | $\langle D_{3coat}(c_{2np}) \rangle$ |
|------------------|----------|------------|--------------------------------------|--------------------------------------|--------------------------------------|--------------------------------------|--------------------------------------|--------------------------------------|
| spherical        | 61       | 4758.43    | 4.85                                 | 30.30                                | 0.51                                 | 2.51                                 | 106.89                               | 11.47                                |
| N/A              | 52       | 15205.8    | 29.73                                | 7.98                                 | 0.45                                 | 2.35                                 | 89.97                                | 15.63                                |
| irregular        | 3        | 5258.69    | 707.33                               | 3.89                                 | 0.33                                 | 2.74                                 | 33.01                                | 14.23                                |
| slice-shaped     | 3        | 1229.2     | 0.00                                 | 0.00                                 | 0.00                                 | 2.55                                 | 0.00                                 | 0.00                                 |
| needle           | 2        | 854.71     | 0.00                                 | 0.00                                 | 0.00                                 | 2.66                                 | 0.00                                 | 0.00                                 |
| rod              | 9        | 161.681    | 0.11                                 | 10.21                                | 0.00                                 | 2.27                                 | 69.44                                | 0.00                                 |
| elliptical       | 21       | 2218.42    | 0.00                                 | 0.00                                 | 0.00                                 | 2.71                                 | 0.00                                 | 0.00                                 |
| pseudo-spherical | 8        | 313.249    | 0.00                                 | 0.00                                 | 0.00                                 | 2.51                                 | 0.00                                 | 0.00                                 |
| polyhedral       | 3        | 331.813    | 0.00                                 | 0.00                                 | 0.00                                 | 2.74                                 | 0.00                                 | 0.00                                 |
| pyramidal        | 10       | 50186.6    | 0.00                                 | 0.00                                 | 0.00                                 | 2.81                                 | 0.00                                 | 0.00                                 |

172

| $c_{3np}$           | $n_{np}$ | $nc_{3np}$ | $\langle D_{1core}(c_{3np}) \rangle$ | $\langle D_{1coat}(c_{3np}) \rangle$ | $\langle D_{2coat}(c_{3np}) \rangle$ | $\langle D_{2core}(c_{3np}) \rangle$ | $\langle D_{4coat}(c_{3np}) \rangle$ | $\langle D_{3coat}(c_{3np}) \rangle$ |
|---------------------|----------|------------|--------------------------------------|--------------------------------------|--------------------------------------|--------------------------------------|--------------------------------------|--------------------------------------|
| Dry                 | 118      | 13487.5    | 33.45                                | 16.23                                | 0.28                                 | 2.48                                 | 61.31                                | 8.45                                 |
| H2O                 | 44       | 1332.96    | 0.41                                 | 10.27                                | 0.50                                 | 2.54                                 | 106.54                               | 12.69                                |
| DMEM                | 3        | 1443.08    | 0.00                                 | 0.00                                 | 0.00                                 | 2.93                                 | 0.00                                 | 0.00                                 |
| RPMI                | 3        | 331.813    | 0.00                                 | 0.00                                 | 0.00                                 | 2.74                                 | 0.00                                 | 0.00                                 |
| 1% Triton X-100/H2O | 3        | 13.1333    | 0.00                                 | 0.00                                 | 0.00                                 | 1.88                                 | 0.00                                 | 0.00                                 |
| H2O/TMAOH           | 1        | 1.03654    | 0.00                                 | 0.00                                 | 0.00                                 | 2.78                                 | 0.00                                 | 0.00                                 |

| $c_{4np}$        | $n_{np}$ | $nc_{4np}$ | $\langle D_{1core}(c_{4np}) \rangle$ | $\langle D_{1coat}(c_{4np}) \rangle$ | $\langle D_{2coat}(c_{4np}) \rangle$ | $\langle D_{2core}(c_{4np}) \rangle$ | $\langle D_{4coat}(c_{4np}) \rangle$ | $\langle D_{3coat}(c_{4np}) \rangle$ |
|------------------|----------|------------|--------------------------------------|--------------------------------------|--------------------------------------|--------------------------------------|--------------------------------------|--------------------------------------|
| UC               | 125      | 12063.8    | 0.00                                 | 0.00                                 | 0.00                                 | 2.58                                 | 0.00                                 | 0.00                                 |
| PEG-Si(OMe)3     | 8        | 16644.5    | 1.00                                 | 142.95                               | 0.00                                 | 2.93                                 | 0.00                                 | 0.00                                 |
| PVA              | 1        | 7671.95    | 2122.00                              | 11.67                                | 1.00                                 | 2.78                                 | 99.02                                | 42.68                                |
| sodium citrate   | 17       | 343.1      | 1.00                                 | 28.79                                | 2.00                                 | 2.18                                 | 270.28                               | 42.68                                |
| 11-mercaptoundec | 3        | 200        | 1.00                                 | 62.13                                | 1.00                                 | 2.54                                 | 377.25                               | 42.68                                |

|                                                              |   |         |         |        |      |      |        |        |  |
|--------------------------------------------------------------|---|---------|---------|--------|------|------|--------|--------|--|
| anoic acid                                                   |   |         |         |        |      |      |        |        |  |
| PVP                                                          | 4 | 63.8915 | 157.50  | 0.00   | 2.32 | 1.93 | 320.99 | 0.00   |  |
| propylammonium<br>fragment                                   | 4 | 5.0381  | 1.00    | 0.00   | 0.00 | 1.90 | 125.16 | 32.90  |  |
| undecylazide<br>fragment                                     | 2 | 10.3254 | 1.00    | 0.00   | 1.59 | 1.90 | 364.40 | 0.00   |  |
| CTAB                                                         | 3 | 4.06159 | 1.00    | 91.87  | 0.00 | 2.54 | 624.95 | 0.00   |  |
| N,N,N-<br>trimethyl-3(1-<br>propene)<br>ammonium<br>fragment | 2 | 2.27148 | 1.00    | 31.95  | 1.00 | 2.01 | 217.33 | 0.00   |  |
| potato starch                                                | 1 | 0.4728  | 1172.00 | 120.91 | 0.00 | 1.93 | 781.29 | 405.70 |  |
| N -<br>acetylcysteine                                        | 2 | 0.049   | 1.00    | 37.69  | 1.59 | 1.90 | 246.33 | 60.69  |  |

**Table S2.** Drug Moving Average values

| $C_{0drug}$        | $n_{jdrug}$ | $\langle ALOGP(C_{0drug}) \rangle$ | $C_{1drug}$               | $n_{jdrug}$ | $\langle ALOGP(C_{1drug}) \rangle$ |
|--------------------|-------------|------------------------------------|---------------------------|-------------|------------------------------------|
| Potency(nM)        | 24750       | 3.29                               | O88496                    | 71.00       | 0.31                               |
| IC50(nM)           | 1402        | 4.24                               | P11473                    | 24189.00    | 3.34                               |
| Activity(%)        | 1079        | 3.79                               | m.d.                      | 9794.00     | 3.55                               |
| Inhibition(%)      | 415         | 3.25                               | P00568                    | 3.00        | -1.86                              |
| EC50(nM)           | 388         | 4.50                               | P41231                    | 2.00        | -1.86                              |
| WEIGHT(g)          | 260         | 3.18                               | Q9NPD5                    | 14.00       | 2.30                               |
| Ratio(-)           | 259         | 5.44                               | Q9Y6L6                    | 13.00       | 1.88                               |
| GI50(nM)           | 258         | 3.81                               | P12931                    | 1.00        | -1.86                              |
| Ki(nM)             | 197         | 3.83                               | P29410                    | 5.00        | -1.86                              |
| Activity(mg/dl)    | 164         | 5.74                               | P29411                    | 4.00        | -1.86                              |
| Activity(-)        | 154         | 5.19                               | P39069                    | 3.00        | -1.86                              |
| FC(-)              | 130         | 5.49                               | P54619, Q13131,<br>Q9Y478 | 3.00        | -1.86                              |
| IC50(ug.mL-1)      | 123         | 1.07                               | P21589                    | 1.00        | -1.86                              |
| BILI(ug.mL-1)      | 99          | 3.10                               | O43598                    | 1.00        | -1.86                              |
| CREAT(ug.mL-1)     | 99          | 3.10                               | Q6DHV7                    | 3.00        | -1.86                              |
| POTASSIUM(mEq.L-1) | 99          | 3.10                               | P00327, P00328            | 1.00        | -1.86                              |
| MCH(pg)            | 99          | 3.10                               | O35820                    | 1.00        | -1.86                              |
| MCV(fL)            | 99          | 3.10                               | P54819                    | 3.00        | -1.86                              |
| LYMLE(%)           | 99          | 3.10                               | P05186                    | 1.00        | -1.86                              |
| PHOS(ug.mL-1)      | 99          | 3.10                               | P0ADG7                    | 1.00        | -1.86                              |
| SODIUM(mEq.L-1)    | 99          | 3.10                               | P00338                    | 2.00        | -1.86                              |
| BUN(ug.mL-1)       | 99          | 3.10                               | P0A9J4                    | 3.00        | -1.18                              |
| CHOL(ug.mL-1)      | 99          | 3.10                               | P02769                    | 25.00       | 4.68                               |
| WBC(cells.uL-1)    | 99          | 3.10                               | P18886                    | 1.00        | -1.81                              |
| ALB(ug.mL-1)       | 99          | 3.10                               | Q63704                    | 1.00        | -1.81                              |
| PROT(ug.mL-1)      | 99          | 3.10                               | P43155                    | 1.00        | -1.81                              |

|                     |    |      |                           |       |       |
|---------------------|----|------|---------------------------|-------|-------|
| HGB(ug.mL-1)        | 99 | 3.10 | P10828                    | 3.00  | 3.83  |
| PLAT(cells.uL-1)    | 99 | 3.10 | P10275                    | 10.00 | 2.52  |
| EOSLE(%)            | 99 | 3.10 | P02752                    | 5.00  | -1.72 |
| MONOLE(%)           | 99 | 3.10 | P33261                    | 6.00  | 0.74  |
| HCT(%)              | 99 | 3.10 | P05177                    | 3.00  | 1.96  |
| GLUC(ug.mL-1)       | 99 | 3.10 | P10635                    | 10.00 | 1.15  |
| RBC(cells.uL-1)     | 99 | 3.10 | P22303                    | 2.00  | -1.69 |
| NEUTLE(%)           | 99 | 3.10 | P07477, P07478,<br>P35030 | 3.00  | -1.69 |
| BASOLE(%)           | 99 | 3.10 | Q05117                    | 4.00  | -1.69 |
| ED50(nM)            | 97 | 5.78 | P03372                    | 9.00  | 4.41  |
| Kd(nM)              | 93 | 3.86 | P25099                    | 1.00  | -1.69 |
| Ratio Ki(-)         | 89 | 5.49 | Q63470                    | 1.00  | -1.69 |
| Relative potency(-) | 87 | 5.92 | P07237                    | 2.00  | -1.69 |
| Ratio ED50(-)       | 84 | 5.95 | P08913                    | 1.00  | -1.69 |
| ED50(M)             | 66 | 5.67 | P18825                    | 1.00  | -1.69 |
| Km(nM)              | 64 | 1.32 | B4URF0                    | 5.00  | -1.69 |
| BILDIR(ug.mL-1)     | 64 | 3.15 | P06276                    | 1.00  | -1.69 |
| ALBGLOB(-)          | 64 | 3.15 | P18089                    | 1.00  | -1.41 |
| GGT(IU.L-1)         | 64 | 3.15 | P05067                    | 4.00  | -1.41 |
| RETIRBC(%)          | 64 | 3.15 | O15296                    | 1.00  | -1.41 |
| PT(s)               | 64 | 3.15 | P49841                    | 1.00  | -1.41 |
| APTT(s)             | 64 | 3.15 | P16050                    | 4.00  | 2.50  |
| MCHC(%)             | 64 | 3.15 | P21567                    | 3.00  | 0.60  |
| ALT(IU.L-1)         | 64 | 3.15 | P00689                    | 5.00  | 1.00  |
| AST(IU.L-1)         | 64 | 3.15 | P04745                    | 2.00  | 1.61  |
| Cl(meq/L)           | 64 | 3.15 | P04746                    | 2.00  | 1.61  |
| CALCIUM(ug.mL-1)    | 64 | 3.15 | Q9H6Z9                    | 1.00  | -1.41 |
| LDH(IU.L-1)         | 64 | 3.15 | Q96KS0                    | 1.00  | -1.41 |
| TERMBW(g)           | 64 | 3.15 | Q9GZT9                    | 1.00  | -1.41 |

|                             |    |      |                |       |       |
|-----------------------------|----|------|----------------|-------|-------|
| TRIG(ug.mL-1)               | 64 | 3.15 | Q9NWT6         | 1.00  | -1.41 |
| PHOSLPD(ug.mL-1)            | 64 | 3.15 | P13674         | 1.00  | -1.41 |
| ALP(IU.L-1)                 | 64 | 3.15 | P0A6I3         | 4.00  | -1.04 |
| FIBRINO(ug.mL-1)            | 64 | 3.15 | P49327         | 1.00  | -0.33 |
| AC50(nM)                    | 53 | 1.60 | O15439         | 3.00  | -0.04 |
| Serum Ca2+(mg dl-1)         | 49 | 6.20 | B0BL08         | 3.00  | -0.04 |
| Serosal/Mucosal Ca(-)       | 48 | 6.22 | P70502         | 1.00  | -0.04 |
| LogP(-)                     | 46 | 1.86 | P04818         | 3.00  | 0.64  |
| Efficacy(%)                 | 41 | 5.28 | Q05932         | 2.00  | -0.04 |
| Serum Ca2+(-)               | 40 | 5.53 | Q96QA9         | 1.00  | -0.04 |
| BCM serum Ca(mg<br>100ml-1) | 39 | 5.91 | P48760         | 6.00  | -0.04 |
| Relative activity(%)        | 37 | 0.77 | O00764         | 1.00  | 0.08  |
| Ac50(uM)                    | 36 | 1.75 | P27695         | 8.00  | 1.73  |
| Relative affinity(-)        | 36 | 6.24 | P05181         | 5.00  | 0.18  |
| EC50(ug.mL-1)               | 35 | 2.16 | Q9NTG7         | 6.00  | 0.18  |
| RBCNUC(/100WBC)             | 35 | 3.02 | Q8IXJ6         | 12.00 | 0.18  |
| LIPASE(U.L-1)               | 35 | 3.02 | P08709, P13726 | 1.00  | 0.18  |
| CHLORIDE(mEq.L-1)           | 35 | 3.02 | O08966         | 2.00  | 0.61  |
| ALP(U.L-1)                  | 35 | 3.02 | Q77YF9         | 3.00  | -0.21 |
| MONO(cells.uL-1)            | 35 | 3.02 | Q9Z0E8         | 1.00  | 0.61  |
| LYM(cells.uL-1)             | 35 | 3.02 | O75496         | 29.00 | 2.97  |
| MCHC(ug.mL-1)               | 35 | 3.02 | O42275         | 8.00  | 0.83  |
| CO2(nM)                     | 35 | 3.02 | Q9R0W2         | 1.00  | 0.61  |
| Activity(mg/L)              | 35 | 2.29 | Q63089         | 1.00  | 0.61  |
| URATE(ug.mL-1)              | 35 | 3.02 | P29401         | 1.00  | 0.61  |
| EOS(cells.uL-1)             | 35 | 3.02 | Q8TDS4         | 49.00 | 0.78  |
| ALT(U.L-1)                  | 35 | 3.02 | Q9EP66         | 6.00  | 0.78  |
| LDH(U.L-1)                  | 35 | 3.02 | Q80Z39         | 4.00  | 0.78  |
| CK(U.L-1)                   | 35 | 3.02 | P49019         | 4.00  | 0.78  |



|                                   |    |       |                |        |       |
|-----------------------------------|----|-------|----------------|--------|-------|
| NEUTSG(cells.uL-1)                | 35 | 3.02  | O94956         | 1.00   | 0.78  |
| AST(U.L-1)                        | 35 | 3.02  | O75164         | 3.00   | 3.07  |
| BASO(cells.uL-1)                  | 35 | 3.02  | P00519, Q13671 | 2.00   | -0.45 |
| MIC50(ug.mL-1)                    | 34 | -1.86 | P37136         | 1.00   | 0.97  |
| Activity(uM)                      | 34 | 3.43  | Q16678         | 2.00   | 0.97  |
| GI(%)                             | 32 | 2.62  | P04798         | 1.00   | 0.97  |
| VDR affinity(%)                   | 24 | 5.03  | Q81VW8         | 1.00   | 0.97  |
| Relative binding affinity(-)      | 24 | 5.56  | P00918         | 1.00   | 0.97  |
| Activity(mg/kg/day)               | 23 | 5.81  | P00915         | 1.00   | 0.97  |
| ED50(mg.kg-1)                     | 22 | 2.54  | A3EZI9         | 1.00   | 0.97  |
| Activity(10 <sup>7</sup> mol/J)   | 20 | -1.41 | P04150         | 23.00  | 4.73  |
| Emax(%)                           | 20 | 4.33  | P54132         | 5.00   | 3.35  |
| Ca <sup>2+</sup> transport S/M(-) | 20 | 5.54  | P15559         | 12.00  | 2.01  |
| Ca <sup>2+</sup> transport(-)     | 20 | 5.51  | P16435         | 1.00   | 2.01  |
| Decrease(%)                       | 19 | 7.53  | P09623         | 6.00   | 2.01  |
| RBA(-)                            | 18 | 5.98  | Q06278         | 5.00   | 2.01  |
| mortality(%)                      | 17 | -1.47 | P27338         | 2.00   | 2.01  |
| Activity(mmol/L)                  | 16 | 4.18  | P11712         | 2.00   | 2.01  |
| Activity(pm/min/mg)               | 16 | 6.43  | P00390         | 5.00   | 2.01  |
| Incorporation(%)                  | 15 | -1.71 | P28593         | 6.00   | 2.01  |
| B50(M)                            | 15 | 6.50  | P21397         | 1.00   | 2.01  |
| ED50(-)                           | 15 | 5.83  | O15770         | 3.00   | 2.01  |
| Ratio EC50(-)                     | 15 | 5.10  | P02545         | 7.00   | 2.74  |
| Control(%)                        | 14 | 5.83  | Q00024         | 11.00  | 2.03  |
| DOSE(mg.kg-1)                     | 14 | 5.94  | Q13393         | 3.00   | 4.60  |
| F(%)                              | 13 | 3.60  | Q7M3G7         | 18.00  | 5.25  |
| Transcriptional activity(%)       | 13 | 4.98  | O42392         | 111.00 | 5.68  |
| Activity(mg)                      | 13 | 4.51  | A3RGC1         | 116.00 | 5.61  |

|                                                       |    |      |        |        |      |
|-------------------------------------------------------|----|------|--------|--------|------|
| ED50(uM)                                              | 12 | 5.20 | P02774 | 56.00  | 5.56 |
| Relative binding potency(-)                           | 12 | 5.16 | O14939 | 3.00   | 4.60 |
| Ratio IC50(-)                                         | 12 | 3.40 | Q06187 | 5.00   | 5.63 |
| No. of pits(-)                                        | 12 | 6.31 | Q28037 | 137.00 | 5.76 |
| pKa(-)                                                | 11 | 1.72 | P13053 | 250.00 | 5.78 |
| Activity(cpm)                                         | 11 | 5.59 | Q07973 | 1.00   | 5.08 |
| Activity(ug ml-1)                                     | 10 | 3.93 | P04276 | 35.00  | 5.87 |
| Hepatotoxicity (severe hepatitis)(-)                  | 10 | 3.27 | P19793 | 32.00  | 5.20 |
| Hepatotoxicity (choleostasis)(-)                      | 10 | 3.27 | P02754 | 3.00   | 5.51 |
| Hepatotoxicity (cytolytic)(-)                         | 10 | 3.27 | P28482 | 8.00   | 3.29 |
| Hepatotoxicity (acute)(%)                             | 10 | 3.27 | P02753 | 1.00   | 5.51 |
| Hepatotoxicity (acute)(-)                             | 10 | 3.27 | Q92753 | 7.00   | 5.60 |
| Hepatotoxicity (moderate)(-)                          | 10 | 3.27 | P13631 | 61.00  | 5.60 |
| Hepatotoxicity (moderate)(%)                          | 10 | 3.27 | P10276 | 56.00  | 5.60 |
| MIC(ug.mL-1)                                          | 10 | 1.76 | P10826 | 62.00  | 5.60 |
| Hepatotoxicity (association with vascular disease)(-) | 10 | 3.27 | P48443 | 15.00  | 5.60 |
| Hepatotoxicity (cirrhosis)(-)                         | 10 | 3.27 | P22605 | 4.00   | 5.60 |
| Hepatotoxicity (steatosis)(-)                         | 10 | 3.27 | P18911 | 3.00   | 5.60 |
| Hepatotoxicity (chronic liver                         | 10 | 3.27 | P28702 | 14.00  | 5.60 |

|                                             |    |      |        |       |      |
|---------------------------------------------|----|------|--------|-------|------|
| disease)(-)                                 |    |      |        |       |      |
| A/Ad(-)                                     | 10 | 5.89 | P11416 | 7.00  | 5.60 |
| Hepatotoxicity (benign tumour)(-)           | 10 | 3.27 | Q8R0V5 | 3.00  | 5.60 |
| Hepatotoxicity (malignant tumour)(-)        | 10 | 3.27 | P08684 | 13.00 | 3.66 |
| Hepatotoxicity (granulomatous hepatitis)(-) | 10 | 3.27 | P28705 | 4.00  | 5.60 |
| Activity(mU)                                | 9  | 2.24 | Q9HAW9 | 1.00  | 5.60 |
| Flu intensity(-)                            | 9  | 3.48 | O60656 | 1.00  | 5.60 |
| AUC(ng.hr.mL-1)                             | 9  | 4.57 | P00860 | 12.00 | 5.60 |
| Ca2+ serum(-)                               | 9  | 5.40 | P28776 | 2.00  | 5.60 |
| DILI positive/negative(-)                   | 9  | 1.03 | P35398 | 2.00  | 5.60 |
| HepSE_ jaundice(-)                          | 8  | 4.51 | P29762 | 1.00  | 5.60 |
| HepSE_bilirubinemia(-)                      | 8  | 4.51 | P40220 | 5.00  | 5.60 |
| HepSE_liver function tests abnormal(-)      | 8  | 4.51 | P41595 | 2.00  | 5.60 |
| HepSE_Combined Scores(-)                    | 8  | 4.51 | P28704 | 4.00  | 5.60 |
| Cp(uM)                                      | 8  | 4.40 | P28700 | 6.00  | 5.60 |
| T1/2(hr)                                    | 8  | 2.49 | P0DMS8 | 2.00  | 5.60 |
| Carboxylase activity(dpm)                   | 8  | 2.49 | Q9PTN2 | 1.00  | 5.70 |
| Relative activity(-)                        | 8  | 3.62 | P25094 | 9.00  | 4.27 |
| Binding affinity(-)                         | 8  | 5.48 | P48281 | 14.00 | 7.12 |
| Activity(log10CFU)                          | 8  | 5.29 | P14416 | 1.00  | 6.69 |
| HepSE_hepatitis(-)                          | 8  | 4.51 | P08908 | 1.00  | 6.69 |
| HepSE_liver disease(-)                      | 8  | 4.51 | O35084 | 9.00  | 6.84 |
| Keq(-)                                      | 8  | 6.82 | P00189 | 2.00  | 6.73 |

|                                        |   |       |                                |       |       |
|----------------------------------------|---|-------|--------------------------------|-------|-------|
| k1(s-1)                                | 8 | 6.82  | A5A0U0                         | 1.00  | 6.73  |
| k-1(s-1)                               | 8 | 6.82  | Q6B4J2                         | 26.00 | 7.89  |
| Activity(ug)                           | 8 | 11.21 | Q99835                         | 2.00  | 7.63  |
| TI(-)                                  | 8 | 2.96  | P49638                         | 3.00  | 8.84  |
| HepSE_cirrhosis(-)                     | 8 | 4.51  | P08170                         | 2.00  | 8.84  |
| HepSE_liver fatty(-)                   | 8 | 4.51  | P38435                         | 3.00  | 8.92  |
| HepSE_hepatomegaly(-)                  | 8 | 4.51  | Q72874                         | 4.00  | -1.86 |
| HepSE_cholecystitis(-)                 | 8 | 4.51  | Q9X034                         | 1.00  | -1.86 |
| HepSE_cholelithiasis(-)                | 8 | 4.51  | P42356, Q8TCG2, Q9BTU6, Q9UBF8 | 1.00  | -1.86 |
| HepSE_hepatic failure(-)               | 8 | 4.51  | P09467                         | 8.00  | -1.86 |
| HepSE_hepatic necrosis(-)              | 8 | 4.51  | Q96KQ7                         | 17.00 | 3.60  |
| HepSE_elevated liver function tests(-) | 8 | 4.51  | P30542                         | 1.00  | -1.86 |
| Activity(microg/ml)                    | 7 | 4.45  | P00636                         | 2.00  | -1.86 |
| Change(%)                              | 7 | 2.16  | P08659                         | 3.00  | 3.79  |
| Reduction(%)                           | 7 | 1.42  | P47900                         | 2.00  | -1.86 |
| Receptor binding(-)                    | 7 | 4.77  | P49798                         | 2.00  | 1.87  |
| Therapeutic index(-)                   | 7 | 5.87  | Q94696                         | 3.00  | -1.86 |
| RCI(-)                                 | 7 | 5.93  | Q13148                         | 6.00  | 0.41  |
| Vmax(pM s-1 mg-1)                      | 7 | 7.92  | P49652                         | 2.00  | -1.86 |
| Relative IC50(nM)                      | 7 | 5.60  | P37840                         | 2.00  | -0.95 |
| Relative Vmax(-)                       | 6 | -1.25 | P14618                         | 5.00  | -0.31 |
| Activity(cm)                           | 6 | -0.47 | Q27686                         | 3.00  | -1.86 |
| deltaA(-)                              | 6 | 5.42  | P19174                         | 1.00  | -1.86 |
| Imax(%)                                | 6 | 2.56  | O75874                         | 1.00  | -1.86 |
| Cmax(nM)                               | 6 | 4.21  | Q96G91                         | 1.00  | -1.86 |
| T/C(-)                                 | 6 | 4.37  | Q9HBX9                         | 1.00  | -1.86 |

|                                   |   |       |                |       |       |
|-----------------------------------|---|-------|----------------|-------|-------|
| Activity(nm)                      | 6 | 6.65  | O94782         | 19.00 | 4.25  |
| Relative EC30(-)                  | 6 | 5.60  | Q16637         | 4.00  | 3.34  |
| Survivors at day 15(%)            | 6 | 5.60  | O15648         | 5.00  | 0.76  |
| NBT positive cells(%)             | 6 | 5.60  | P07378         | 1.00  | -1.86 |
| Survivors at day 8(%)             | 6 | 5.60  | Q57TT1         | 1.00  | -1.86 |
| Dose(mg kg-1 day-1)               | 6 | 6.23  | P17405         | 2.00  | -0.95 |
| Binding ratio(-)                  | 6 | 5.70  | O94759         | 1.00  | -1.86 |
| Ca2+ current(mV)                  | 6 | 5.70  | P83916         | 6.00  | 0.77  |
| Drug metabolism(%)                | 6 | 7.09  | Q01970         | 1.00  | -1.86 |
| RCI(%)                            | 6 | 6.01  | P28329         | 1.00  | -1.86 |
| Activity(mM)                      | 6 | 0.16  | O88909         | 1.00  | -1.81 |
| EC30(nM)                          | 6 | 5.60  | P00811         | 7.00  | 1.24  |
| Relative EC30(nM)                 | 6 | 5.60  | Q96QE3         | 3.00  | 1.77  |
| Activity(nmol/g)                  | 5 | -3.25 | Q03431         | 3.00  | 4.21  |
| Radioactivity(%)                  | 5 | -1.86 | Q99895         | 1.00  | -1.72 |
| Kcat(/s)                          | 5 | -0.92 | P00346         | 1.00  | -1.72 |
| TIME(hr)                          | 5 | 1.55  | P38398         | 2.00  | -1.72 |
| Activity(umol)                    | 5 | -1.41 | O00255, Q03164 | 7.00  | 3.17  |
| Cmax(ug.mL-1)                     | 5 | 3.85  | B2RXH2         | 6.00  | 0.37  |
| IZ(mm)                            | 5 | 1.76  | O97447         | 9.00  | 1.54  |
| logD(-)                           | 5 | 1.74  | Q9NUW8         | 2.00  | -0.88 |
| Kcat(/min)                        | 5 | 4.30  | P00352         | 17.00 | 3.55  |
| Tmax(hr)                          | 5 | 4.88  | P97697         | 3.00  | 0.77  |
| Relative IC50(-)                  | 5 | 5.60  | O75604         | 3.00  | 1.93  |
| Differentiation activity ratio(-) | 5 | 5.70  | P29466         | 2.00  | -1.72 |
| ICA(-)                            | 5 | 5.90  | P55210         | 2.00  | -1.72 |
| Biological evaluation(-)          | 5 | 5.79  | P15428         | 5.00  | 1.59  |
| Vmax(%)                           | 4 | -1.41 | P02791         | 5.00  | 3.43  |
| Activity(umol/g)                  | 4 | -1.69 | P15917         | 4.00  | 1.04  |

|                                                      |   |       |        |       |       |
|------------------------------------------------------|---|-------|--------|-------|-------|
| ID50(uM)                                             | 4 | 1.06  | Q99714 | 6.00  | 0.70  |
| Activity(mmolequiv/m<br>mol)                         | 4 | -1.41 | Q92830 | 6.00  | 2.58  |
| Frequency(-)                                         | 4 | 3.72  | Q03181 | 7.00  | 4.06  |
| TAC(U)                                               | 4 | -1.41 | Q16236 | 15.00 | 4.65  |
| Activity(umol/L)                                     | 4 | -1.41 | Q96R11 | 5.00  | 3.48  |
| Tritium release(%)                                   | 4 | -0.04 | P46063 | 2.00  | 1.94  |
| Liver weight(g)                                      | 4 | 0.78  | P19838 | 1.00  | -1.72 |
| Survival(%)                                          | 4 | 0.78  | P01375 | 1.00  | -1.72 |
| Serum TG(mg dl-1)                                    | 4 | 0.78  | P37231 | 6.00  | 3.56  |
| CL(mL.min-1.kg-1)                                    | 4 | 1.76  | P33527 | 1.00  | -1.69 |
| Selectivity ratio(-)                                 | 4 | 1.04  | Q9UNQ0 | 2.00  | -1.69 |
| Activity(umol/L/min)                                 | 4 | 2.01  | P03468 | 2.00  | -1.69 |
| k cat(s-1)                                           | 4 | 2.01  | P81908 | 3.00  | 1.97  |
| Activity(g/cm2)                                      | 4 | 5.36  | O42713 | 5.00  | 0.81  |
| Solubility(ug.mL-1)                                  | 4 | 1.79  | P11064 | 1.00  | -1.69 |
| Binding potency(-)                                   | 4 | 5.39  | P35354 | 2.00  | -0.46 |
| Mean tumor<br>volume(cm*3)                           | 4 | 5.60  | P34913 | 2.00  | -1.69 |
| Relative luciferase<br>response(-)                   | 4 | 5.60  | Q9GZQ4 | 1.00  | -1.69 |
| Potency(-)                                           | 4 | 6.02  | P10253 | 6.00  | 0.64  |
| Activity(pM 10min-1)                                 | 4 | 5.99  | Q9NR56 | 4.00  | -0.77 |
| Binding(%)                                           | 4 | 5.97  | P06746 | 2.00  | -0.87 |
| permeability(ng/cm2/<br>min)                         | 4 | 6.56  | O94925 | 1.00  | -1.69 |
| permeability(%)                                      | 4 | 6.56  | P07943 | 1.00  | -1.69 |
| Ca2+ binding<br>protein(ug (100mg of<br>duodenum)-1) | 4 | 6.73  | Q9UBT6 | 4.00  | 5.09  |
| Incidence(N)                                         | 4 | 3.72  | Q962Y6 | 9.00  | 4.70  |

|                                                |   |       |        |       |       |
|------------------------------------------------|---|-------|--------|-------|-------|
| Duration(s)                                    | 4 | 3.72  | P10636 | 22.00 | 5.07  |
| EC50(ug)                                       | 3 | 1.82  | P10481 | 1.00  | -1.69 |
| ED50(ug ml-1)                                  | 3 | 1.82  | Q99700 | 2.00  | 0.16  |
| Activity(U (mg of protein)-1)                  | 3 | -1.69 | P47989 | 1.00  | -1.69 |
| MIC(ug)                                        | 3 | -1.41 | P03469 | 2.00  | -1.69 |
| Scavenging activity(%)                         | 3 | 4.02  | P27487 | 1.00  | -1.69 |
| Vmax(-)                                        | 3 | -0.04 | P48147 | 1.00  | -1.69 |
| log K(-)                                       | 3 | 1.85  | P04762 | 2.00  | 3.72  |
| k cat/Km(10e4 M-1 s-1)                         | 3 | 2.01  | Q9UGH3 | 2.00  | -1.41 |
| Vmax(uM min-1mg-1)                             | 3 | 2.01  | P11344 | 2.00  | -1.41 |
| Average weight change(%)                       | 3 | 2.01  | P09917 | 1.00  | -1.41 |
| Activity(micromol/min )                        | 3 | 0.87  | P18054 | 1.00  | -1.41 |
| VDR affinity(M)                                | 3 | 4.90  | P14679 | 2.00  | -1.41 |
| MTD(ug/kg)                                     | 3 | 5.47  | Q54873 | 1.00  | -1.41 |
| Affinity(%)                                    | 3 | 5.89  | Q9F4F7 | 6.00  | 3.80  |
| GGT Increase - Index Value(-)                  | 3 | 3.16  | Q9UNA4 | 7.00  | 3.66  |
| LDH Increase - Index Value(-)                  | 3 | 3.16  | O15245 | 2.00  | 0.29  |
| Alkaline Phosphatase Increase - Index Value(-) | 3 | 3.16  | P43220 | 3.00  | 1.25  |
| Mortality range(day)                           | 3 | 5.60  | P16473 | 7.00  | 2.35  |
| Kd(-)                                          | 3 | 5.60  | P06280 | 1.00  | -0.04 |
| Differentiated cells(%)                        | 3 | 5.60  | P04062 | 1.00  | -0.04 |
| Expression(%)                                  | 3 | 5.60  | P07607 | 2.00  | -0.04 |
| ED50(10'-10M)                                  | 3 | 5.73  | O89049 | 7.00  | 4.73  |

|                                                            |   |       |        |       |      |
|------------------------------------------------------------|---|-------|--------|-------|------|
| Delta Tm(degrees C)                                        | 3 | 5.70  | P04637 | 5.00  | 2.75 |
| Log A(s-1)                                                 | 3 | 6.68  | O95342 | 1.00  | 0.08 |
| ED50(10 <sup>-9</sup> M)                                   | 3 | 5.73  | O70127 | 1.00  | 0.08 |
| RBA(%)                                                     | 3 | 6.70  | Q96EB6 | 12.00 | 0.18 |
| Kcat/Km(10 <sup>4</sup> /M/s)                              | 3 | 6.84  | Q8N6T7 | 3.00  | 0.18 |
| Fold change(-)                                             | 3 | 4.83  | P97612 | 1.00  | 0.18 |
| PC50(uM)                                                   | 3 | 8.84  | Q8I6E4 | 1.00  | 0.18 |
| Composite Activity -<br>Active(-)                          | 3 | 3.16  | Q9NXA8 | 2.00  | 0.18 |
| SGOT Increase - Index<br>Value(-)                          | 3 | 3.16  | P06700 | 1.00  | 0.18 |
| SGPT Increase - Index<br>Value(-)                          | 3 | 3.16  | P53686 | 1.00  | 0.18 |
| Composite Activity -<br>Marginal(-)                        | 3 | 3.16  | P09874 | 5.00  | 0.18 |
| GGT Increase -<br>Number of Reports(-)                     | 3 | 3.16  | Q9H3S4 | 1.00  | 0.61 |
| LDH Increase - Number<br>of Reports(-)                     | 3 | 3.16  | P07900 | 2.00  | 0.61 |
| SGOT Increase -<br>Number of Reports(-)                    | 3 | 3.16  | P80456 | 3.00  | 1.19 |
| SGPT Increase -<br>Number of Reports(-)                    | 3 | 3.16  | Q96FL8 | 2.00  | 0.78 |
| Alkaline Phosphatase<br>Increase - Number of<br>Reports(-) | 3 | 3.16  | Q9UIF8 | 4.00  | 4.33 |
| Vdss(L.kg-1)                                               | 3 | 0.78  | P00432 | 1.00  | 0.78 |
| ID50(nM)                                                   | 3 | 5.60  | P14920 | 1.00  | 0.78 |
| MTC(uM)                                                    | 3 | 8.84  | Q99489 | 1.00  | 0.78 |
| Kcat/Km(10 <sup>6</sup> /M/s)                              | 2 | -1.86 | P22629 | 1.00  | 0.80 |
| K(10 <sup>4</sup> L/mol)                                   | 2 | -1.81 | Q194T2 | 2.00  | 3.20 |



|                               |   |       |                           |       |      |
|-------------------------------|---|-------|---------------------------|-------|------|
| Activity(g)                   | 2 | -0.47 | P23467                    | 1.00  | 0.80 |
| Activity(kg/ha)               | 2 | -0.47 | P14735                    | 2.00  | 0.80 |
| Stability(-)                  | 2 | -1.69 | Q9UQ49                    | 1.00  | 0.97 |
| K(10'6/M/s)                   | 2 | 3.58  | P11308                    | 1.00  | 0.97 |
| IC25(uM)                      | 2 | -1.69 | P80244                    | 1.00  | 0.97 |
| IC30(uM)                      | 2 | -1.69 | P80404                    | 1.00  | 0.97 |
| IC50(molar ratio)             | 2 | 1.96  | P51649                    | 1.00  | 0.97 |
| Activity(IU)                  | 2 | -1.41 | P51580                    | 1.00  | 0.97 |
| OD(-)                         | 2 | -1.41 | P02768                    | 1.00  | 1.77 |
| IC0.2(uM)                     | 2 | 3.72  | P35498, Q99250,<br>Q9NY46 | 2.00  | 1.77 |
| Activity(nmol)                | 2 | -1.41 | Q6W5P4                    | 1.00  | 1.77 |
| Activity(mmol/g)              | 2 | -1.55 | P0A6C1                    | 1.00  | 1.77 |
| MNTD(uM)                      | 2 | 1.61  | P08482                    | 2.00  | 1.77 |
| MED(mg Kg-1)                  | 2 | 0.48  | P38532                    | 1.00  | 1.77 |
| Serum LDL-<br>cholesterol(%)  | 2 | 0.78  | Q3B792                    | 1.00  | 2.01 |
| Serum cholesterol(%)          | 2 | 0.78  | P10845                    | 1.00  | 2.01 |
| Serum HDL-<br>cholesterol(%)  | 2 | 0.78  | P00469                    | 1.00  | 2.01 |
| Activity(mg kg-1)             | 2 | 0.78  | P30305                    | 4.00  | 2.01 |
| PPB(%)                        | 2 | 0.78  | P46426                    | 1.00  | 2.01 |
| Binding energy(kCal<br>mol-1) | 2 | 3.25  | Q5FB27                    | 1.00  | 2.01 |
| Ka(M-1)                       | 2 | 0.80  | O54754                    | 1.00  | 2.01 |
| Log M(-)                      | 2 | 0.97  | Q9Z0U5                    | 1.00  | 2.01 |
| MIC(nM)                       | 2 | 1.49  | P14902                    | 2.00  | 2.01 |
| LogD7.4(-)                    | 2 | 0.93  | P51450                    | 22.00 | 5.54 |
| logIC50(-)                    | 2 | 0.04  | P00883                    | 1.00  | 2.01 |
| Vmax(uM s-1)                  | 2 | 2.01  | O60240, Q8WTS1            | 1.00  | 2.01 |
| Toxic dose(uM)                | 2 | 2.01  | Q00G26, Q8WTS1            | 1.00  | 2.01 |

|                                                                                           |   |      |        |       |      |
|-------------------------------------------------------------------------------------------|---|------|--------|-------|------|
| PD50(nM)                                                                                  | 2 | 5.47 | P04406 | 1.00  | 2.01 |
| TC50(nM)                                                                                  | 2 | 5.47 | P68871 | 1.00  | 2.01 |
| Relative peroxidation(-)                                                                  | 2 | 3.54 | Q16665 | 4.00  | 3.81 |
| AUC(uM.hr)                                                                                | 2 | 4.37 | P30307 | 2.00  | 2.01 |
| Flu intensity(a.u.)                                                                       | 2 | 5.20 | Q64346 | 1.00  | 2.01 |
| Binding affinity(%)                                                                       | 2 | 5.14 | Q9HC16 | 1.00  | 2.01 |
| Kq(10 <sup>13</sup> /M/sec)                                                               | 2 | 5.56 | P28563 | 1.00  | 2.01 |
| K(10 <sup>6</sup> /M)                                                                     | 2 | 5.56 | O95398 | 6.00  | 8.02 |
| Activity(U)                                                                               | 2 | 2.05 | P84022 | 2.00  | 5.47 |
| Tumor volume(cm <sup>3</sup> )                                                            | 2 | 5.60 | Q13315 | 1.00  | 2.01 |
| ODC Activity((nM of CO <sub>2</sub> ) 30min <sup>-1</sup> (mg of protein) <sup>-1</sup> ) | 2 | 5.60 | P15374 | 1.00  | 2.01 |
| No. of tumors/mouse(-)                                                                    | 2 | 5.60 | Q9Y253 | 2.00  | 5.59 |
| NBT positivity(%)                                                                         | 2 | 5.65 | P09936 | 1.00  | 2.01 |
| Drug uptake(%)                                                                            | 2 | 5.70 | P42858 | 2.00  | 2.78 |
| Activity(10 <sup>5</sup> /ml)                                                             | 2 | 5.70 | Q09128 | 18.00 | 4.31 |
| Cell proliferation(%)                                                                     | 2 | 5.65 | P22310 | 4.00  | 6.59 |
| Activity(pg/ml)                                                                           | 2 | 5.20 | Q12809 | 1.00  | 5.51 |
| ED50(10 <sup>-8</sup> M)                                                                  | 2 | 5.95 | Q9R1A7 | 4.00  | 5.56 |
| Activity(mgequiv/mmol)                                                                    | 2 | 3.50 | P10145 | 2.00  | 6.57 |
| Phagocytosis(-)                                                                           | 2 | 6.22 | P25779 | 9.00  | 6.76 |
| Binding activity(-)                                                                       | 2 | 6.22 | P51449 | 5.00  | 5.99 |
| Antilipid peroxidation(%)                                                                 | 2 | 3.72 | P22309 | 5.00  | 6.41 |
| Reducing activity(%)                                                                      | 2 | 3.72 | Q9HAW7 | 1.00  | 5.60 |
| Activity(nM/mg)                                                                           | 2 | 8.84 | Q9HAW8 | 2.00  | 5.60 |
| Activity(U/mg)                                                                            | 2 | 3.72 | P09057 | 1.00  | 5.60 |

|                                        |   |       |                                |                |                      |
|----------------------------------------|---|-------|--------------------------------|----------------|----------------------|
| Activity(min)                          | 2 | 3.72  | P62965                         | 2.00           | 5.60                 |
| Activity(cm2)                          | 2 | 8.84  | P22935                         | 2.00           | 5.60                 |
| SVT(%)                                 | 2 | 8.84  | Q99549                         | 1.00           | 5.60                 |
| SVT(-)                                 | 2 | 8.84  | P08183                         | 2.00           | 6.69                 |
| RIA(%)                                 | 2 | 0.78  | P07711                         | 1.00           | 6.73                 |
| Hammett constant(-)                    | 2 | 0.97  | P23415                         | 3.00           | 7.62                 |
| K cat/Km(1/M*s)                        | 2 | 2.01  | P16662                         | 2.00           | 8.24                 |
| Concentration(M)                       | 2 | 5.70  | O00167                         | 1.00           | 7.64                 |
| ED20(nM)                               | 2 | 5.70  | O95149, P62826,<br>Q14974      | 3.00           | 8.94                 |
| SMT(s)                                 | 2 | 8.84  | P49768                         | 3.00           | 8.84                 |
| RRT(s)                                 | 2 | 8.84  | O75469                         | 1.00           | 8.92                 |
| TC50(uM)                               | 2 | 8.84  | O95149, Q14974                 | 1.00           | 8.92                 |
| Solubility(nM)                         | 1 | -1.86 | P63092                         | 1.00           | 11.54                |
| CC50(nM)                               | 1 | -1.69 | $C_{3drug}$                    | $\eta_{jdrug}$ | $<ALOGP(C_{3drug})>$ |
| Kcat/Km(/s/micromM)                    | 1 | -1.86 | m.d.                           | 26435          | 3.24                 |
| k_off(s-1)                             | 1 | -1.86 | Rattus norvegicus              | 5385           | 3.59                 |
| Kcat(10 <sup>-3</sup> /s)              | 1 | -1.86 | Homo sapiens                   | 2756           | 4.62                 |
| MTD(uM)                                | 1 | -1.86 | Cricetulus griseus             | 74             | 4.65                 |
| Vmax(micromol/min)                     | 1 | -1.86 | Oryctolagus cuniculus          | 22             | 0.33                 |
| k_on(M-1.s-1)                          | 1 | -1.86 | Human herpesvirus 1            | 4              | -0.13                |
| permeability(10 <sup>-6</sup><br>cm/s) | 1 | -1.81 | Measles virus                  | 2              | -1.86                |
| Activity(V)                            | 1 | -1.69 | Sindbis virus                  | 2              | -1.86                |
| ID50(mg)                               | 1 | -1.69 | Semliki forest virus           | 2              | -1.86                |
| K(10 <sup>4</sup> /M/s)                | 1 | -1.69 | Human coxsackievirus<br>B4     | 4              | -1.86                |
| Ratio CC50/IC50(-)                     | 1 | -1.69 | reo-1 virus                    | 2              | -1.86                |
| K(10 <sup>8</sup> /M/s)                | 1 | -1.69 | Human parainfluenza<br>virus 1 | 2              | -1.86                |
| pID50(-)                               | 1 | -1.69 | Cercopithecidae                | 17             | 4.72                 |

|                              |   |       |                                        |     |       |
|------------------------------|---|-------|----------------------------------------|-----|-------|
| Activity(nmol/ml)            | 1 | -1.69 | Vaccinia virus                         | 2   | -1.86 |
| Retention_time(min)          | 1 | -1.69 | polio-1 virus                          | 2   | -1.86 |
| Activity(mg/g)               | 1 | -1.69 | Vesicular stomatitis virus             | 4   | -1.86 |
| Maximal relaxation(%)        | 1 | -1.69 | herpes simplex type-2 virus            | 2   | -1.86 |
| IC25(nM)                     | 1 | -1.69 | Mycobacterium tuberculosis             | 21  | 1.02  |
| deltaA(%)                    | 1 | -1.69 | Equus caballus                         | 9   | 2.36  |
| INH(ug)                      | 1 | -1.69 | Methanothermobacter thermautotrophicus | 1   | -1.86 |
| k'(-)                        | 1 | -1.41 | Bos taurus                             | 153 | 5.39  |
| Activity(mIU/ml)             | 1 | -1.41 | Columba livia                          | 1   | -1.81 |
| Distribution percent(-)      | 1 | -1.41 | Cenchrus americanus                    | 45  | -0.34 |
| Activity(mMequiv)            | 1 | -1.41 | Gallus gallus                          | 194 | 5.39  |
| Activity(nmol/mg)            | 1 | -1.41 | Mus musculus                           | 522 | 5.02  |
| SC50(mM)                     | 1 | -1.41 | Moloney murine leukemia virus          | 2   | -1.69 |
| Vmax(nM hr-1 (10e6*cells)-1) | 1 | -1.41 | Human herpesvirus 4                    | 29  | 3.33  |
| Rate of rotation(-)          | 1 | -1.41 | Heterodera zaeae                       | 16  | -1.69 |
| SC50(ug ml-1)                | 1 | -1.41 | Meloidogyne incognita                  | 2   | -0.46 |
| Kt(uM)                       | 1 | -1.41 | Influenza A virus                      | 3   | -1.69 |
| Inactivation(%)              | 1 | -1.41 | Canis lupus familiaris                 | 14  | 1.76  |
| Stimulation(%)               | 1 | -1.41 | Ovis aries                             | 2   | -1.64 |
| kONOO-(M-1 s-1)              | 1 | -1.41 | malt                                   | 5   | 1.00  |
| Inhibitory concentration(mM) | 1 | -1.41 | Fungi                                  | 2   | 1.61  |
| K(M-1 s-1)                   | 1 | -1.41 | Bacteria                               | 2   | 1.61  |
| k cat(M-1 s-1)               | 1 | -1.41 | Musa acuminata                         | 2   | -1.41 |
| kred(M-1 s-1)                | 1 | -1.41 | Trypanosoma cruzi                      | 22  | 3.72  |

|                                |   |       |                                  |     |      |
|--------------------------------|---|-------|----------------------------------|-----|------|
| Vmax(microM/s)                 | 1 | -1.04 | Escherichia coli                 | 24  | 0.91 |
| Kq(10'13L/mol/s)               | 1 | -1.04 | Sus scrofa                       | 124 | 5.22 |
| KSV(10'5L/mol)                 | 1 | -1.04 | Xenopus laevis                   | 1   | 0.61 |
| Kq(10'5L/mol)                  | 1 | -1.04 | Human immunodeficiency virus 1   | 8   | 0.09 |
| Kq(10'4L/mol)                  | 1 | -1.04 | Electrophorus electricus         | 8   | 0.83 |
| Kq(10'12L/mol/s)               | 1 | -1.04 | Macaca fascicularis              | 2   | 1.40 |
| KSV(10'4L/mol)                 | 1 | -1.04 | Gibberella moniliformis          | 1   | 0.78 |
| Kcat/Km(/mM/min)               | 1 | -1.04 | Staphylococcus aureus            | 12  | 1.53 |
| Kcat/Km(/mM/s)                 | 1 | -1.04 | Not specified                    | 5   | 2.09 |
| k(-)                           | 1 | -0.04 | Filobasidiella neoformans        | 1   | 0.97 |
| Km app(rel)                    | 1 | -0.04 | Candida albicans                 | 4   | 0.83 |
| Concentration(uM)              | 1 | -0.04 | Bacillus anthracis               | 2   | 3.29 |
| Km(-)                          | 1 | -0.04 | Hepatitis C virus                | 3   | 5.82 |
| Km app(-)                      | 1 | -0.04 | Saccharomyces cerevisiae         | 5   | 1.05 |
| fCmax(uM)                      | 1 | 0.08  | Cavia porcellus                  | 18  | 4.21 |
| Vmax(pmol/mg/min)              | 1 | 0.18  | Plasmodium falciparum            | 43  | 2.90 |
| Kcat/Km(10^-5/nM/s)            | 1 | 0.61  | Mycobacterium bovis BCG          | 5   | 2.01 |
| log Kp(-)                      | 1 | 0.78  | Leishmania donovani              | 3   | 0.79 |
| AUC(microM/hr/mg)              | 1 | 0.78  | Setaria cervi                    | 2   | 2.01 |
| LTKB_BD DILI severity score(-) | 1 | 0.78  | Erwinia amylovora                | 1   | 2.01 |
| MED(-)                         | 1 | 0.78  | Mycobacterium tuberculosis H37Rv | 9   | 5.68 |

|                                                 |   |      |                                  |    |       |
|-------------------------------------------------|---|------|----------------------------------|----|-------|
| Vigour_index(-)                                 | 1 | 0.78 | Cricetinae                       | 32 | 5.66  |
| Transport(pM min-1<br>(mg of protein)-1)        | 1 | 0.80 | Rangifer tarandus                | 2  | 5.51  |
| Kis(uM)                                         | 1 | 0.80 | Dictyostelium<br>discoideum AX2  | 2  | 5.56  |
| Ka(/M)                                          | 1 | 0.80 | Mesocricetus auratus             | 5  | 8.19  |
| Log 1/C(-)                                      | 1 | 0.97 | Naja mossambica<br>mossambica    | 2  | 5.60  |
| Log LD50(-)                                     | 1 | 0.97 | Danio rerio                      | 1  | 5.70  |
| Rm(-)                                           | 1 | 0.97 | Clupea                           | 2  | 8.84  |
| Activity(10'<br>10mol/min)                      | 1 | 0.97 | Glycine max                      | 3  | 8.91  |
| pLD50(-)                                        | 1 | 0.97 | Thermotoga maritima              | 1  | -1.86 |
| Concentration(nM)                               | 1 | 0.97 | Chlorocebus aethiops             | 2  | 0.07  |
| Log S(-)                                        | 1 | 1.77 | Rous sarcoma virus               | 1  | -1.86 |
| logS0(-)                                        | 1 | 1.77 | Photinus pyralis                 | 1  | -1.86 |
| Log PNalk(-)                                    | 1 | 1.77 | Photuris pennsylvanica           | 3  | -1.86 |
| Log K'(-)                                       | 1 | 1.77 | Meleagris gallopavo              | 2  | -1.86 |
| Log sensitivity(-)                              | 1 | 1.77 | Leishmania mexicana<br>mexicana  | 3  | -1.86 |
| logPn(-)                                        | 1 | 1.77 | Trypanosoma brucei<br>TREU927    | 4  | -0.45 |
| Stabilty(%)                                     | 1 | 1.77 | Trypanosoma brucei               | 2  | 1.87  |
| AD(mM l-1)                                      | 1 | 1.77 | squid                            | 1  | -1.86 |
| LD50(umol.kg-1)                                 | 1 | 1.77 | unidentified                     | 1  | -1.72 |
| k2(M-1 s-1)                                     | 1 | 2.01 | Giardia intestinalis             | 10 | 1.22  |
| ED25(mM kg-1)                                   | 1 | 2.01 | Bacillus anthracis str.<br>A2012 | 3  | -0.48 |
| Phospholipidosis as %<br>of positive control(%) | 1 | 2.01 | Trichophyton<br>tonsurans        | 2  | -1.69 |
| Ratio(/M/s)                                     | 1 | 2.01 | Trichophyton                     | 2  | -1.69 |

|                                                                  |   |      |                                                |   |       |
|------------------------------------------------------------------|---|------|------------------------------------------------|---|-------|
|                                                                  |   |      | mentagrophytes                                 |   |       |
|                                                                  |   |      | Salmonella enterica                            |   |       |
| log Ks(-)                                                        | 1 | 2.01 | subsp. enterica                                | 8 | 3.58  |
|                                                                  |   |      | serovar Typhimurium                            |   |       |
| Maximum test concentration that did not exhibit cytotoxicity(uM) | 1 | 2.01 | Influenza A virus (A/Puerto Rico/8/1934(H1N1)) | 3 | -1.69 |
| k(se-1)                                                          | 1 | 2.01 | Epidermophyton floccosum                       | 2 | -1.69 |
| DC50(microg/cm2)                                                 | 1 | 2.01 | Trichophyton violaceum                         | 2 | -1.69 |
| ED25(mg kg-1)                                                    | 1 | 2.01 | Arthroderma cajetani                           | 2 | -1.69 |
| FDI(%)                                                           | 1 | 2.01 | Microsporium gypseum                           | 1 | -1.69 |
| LD50(uM)                                                         | 1 | 2.01 | Trichophyton rubrum                            | 2 | -1.69 |
| Optimal dose(%)                                                  | 1 | 2.01 | Agaricus bisporus                              | 5 | 0.81  |
| LD50(mg.kg-1)                                                    | 1 | 2.01 | Cryptococcus neoformans                        | 1 | -1.69 |
| x fold(uM)                                                       | 1 | 2.01 | Verticillium dahliae                           | 1 | -1.69 |
| Activity(umol/min/mg)                                            | 1 | 2.01 | Entamoeba histolytica HM-1:IMSS                | 1 | -1.69 |
| K cat/Km(1/M.s)                                                  | 1 | 2.01 | Entamoeba histolytica                          | 1 | -1.69 |
| Vmax(uM)                                                         | 1 | 2.01 | Dengue virus                                   | 1 | -1.69 |
| k cat/Km(M-1 s-1)                                                | 1 | 2.01 | Trichomonas vaginalis                          | 2 | -1.69 |
| Kcat/Km(-)                                                       | 1 | 2.01 | Schistosoma mansoni                            | 9 | 4.70  |
| AUC(min.kg/L)                                                    | 1 | 3.85 | Clostridium perfringens                        | 1 | -1.69 |
| CL(mL.min-1.g-1)                                                 | 1 | 4.69 | Influenza A virus (A/Perth/16/2009(H3N2))      | 1 | -1.69 |
| Ratio(%)                                                         | 1 | 4.69 | Influenza A virus (A/California/07/2009(       | 2 | -0.45 |

|                                           |   |      | H1N1))                                    |   |       |
|-------------------------------------------|---|------|-------------------------------------------|---|-------|
| Log Kd(-)                                 | 1 | 5.51 | Influenza B virus                         | 1 | -1.69 |
| Activity(a.u.)                            | 1 | 5.51 | Influenza B virus<br>(B/Brisbane/60/2008) | 1 | -1.69 |
| Vm(10 <sup>1</sup> -4m <sup>3</sup> /mol) | 1 | 5.51 | Enterovirus A71                           | 1 | -1.69 |
| pAH50(-)                                  | 1 | 5.51 | mushroom                                  | 1 | -1.41 |
| logPapp(-)                                | 1 | 5.60 | Vibrio harveyi                            | 1 | -1.41 |
| ED1/3(M)                                  | 1 | 5.60 | Streptococcus<br>pneumoniae               | 2 | -1.41 |
| ID50(nmol)                                | 1 | 5.60 | Streptococcus<br>agalactiae               | 5 | 2.21  |
| delta logD(-)                             | 1 | 5.60 | Bacillus subtilis                         | 7 | 3.40  |
| permeability(10 <sup>1</sup> -4<br>cm/s)  | 1 | 5.60 | Leishmania infantum                       | 1 | 0.18  |
| Tumor(number)                             | 1 | 5.60 | Trypanosoma brucei<br>rhodesiense         | 1 | 0.18  |
| IC60(nM)                                  | 1 | 5.60 | Lactococcus lactis                        | 2 | 0.61  |
| IC80(nM)                                  | 1 | 5.60 | Streptomyces avidinii                     | 1 | 0.80  |
| ED30(nM)                                  | 1 | 5.60 | unidentified influenza<br>virus           | 1 | 0.97  |
| Daq(10 <sup>1</sup> -6cm <sup>2</sup> /s) | 1 | 5.60 | frog                                      | 1 | 1.77  |
| Average(%)                                | 1 | 5.60 | Aspergillus niger                         | 1 | 2.01  |
| Activity(pmol)                            | 1 | 5.60 | Clostridium botulinum                     | 1 | 2.01  |
| Selectivity(-)                            | 1 | 5.60 | Lactobacillus casei                       | 1 | 2.01  |
| Tumor latency(day)                        | 1 | 5.60 | Trichoplusia ni                           | 3 | 2.01  |
| Tumor incidence(%)                        | 1 | 5.60 | Drosophila                                | 7 | 3.52  |
| Aggregation(%)                            | 1 | 5.60 | Influenza A virus<br>(A/WSN/1933(H1N1))   | 1 | 5.60  |
| Differentiation(%)                        | 1 | 5.60 | Plasmodium<br>falciparum HB3              | 1 | 5.60  |
| RA(%)                                     | 1 | 5.60 | Plasmodium                                | 1 | 5.60  |



|                                                   |   |      | falciparum 7G8        |             |                                    |
|---------------------------------------------------|---|------|-----------------------|-------------|------------------------------------|
|                                                   |   |      | Rhopilema esculentum  | 1           | 8.84                               |
|                                                   |   |      | $C_{4drug}$           | $n_{jdrug}$ | $\langle ALOGP(C_{4drug}) \rangle$ |
| MTD(ug/kg/day)                                    | 1 | 5.70 | m.d.                  | 31513       | 3.46                               |
| Activity ratio(-)                                 | 1 | 5.70 | Wistar                | 46          | 4.64                               |
| LD50(10 <sup>-7</sup> M)                          | 1 | 5.70 | cultivar 7042S        | 45          | -0.34                              |
| LD50(10 <sup>-6</sup> M)                          | 1 | 5.70 | KM                    | 5           | -1.69                              |
| Plasma Ca <sup>2+</sup> (mg dl <sup>-1</sup> )    | 1 | 5.70 | Charles foster        | 3           | -1.69                              |
| Stability(%)                                      | 1 | 5.70 | BALB/c                | 12          | 1.12                               |
| Ca <sup>2+</sup> excretion(uM day <sup>-1</sup> ) | 1 | 5.70 | C57BL/6               | 24          | 0.65                               |
| Kidney VDR(fM (mg of protein) <sup>-1</sup> )     | 1 | 5.70 | A/Bervig_Mission/1/18 | 2           | -1.69                              |
| ED50(10 <sup>-6</sup> M)                          | 1 | 5.95 | Wistar albino         | 31          | 1.24                               |
| BPR(-)                                            | 1 | 6.29 | New Zealand White     | 2           | -1.41                              |
| CS50(-)                                           | 1 | 6.63 | Sprague-Dawley        | 4414        | 3.28                               |
| Activity(mU ml <sup>-1</sup> )                    | 1 | 6.73 | K12                   | 4           | -1.04                              |
| Hydroxyproline release(ug ml <sup>-1</sup> )      | 1 | 6.73 | beagle                | 2           | 0.78                               |
| K(uM)                                             | 1 | 7.62 | SD, HW or BN          | 1           | 0.78                               |
| %max(%)                                           | 1 | 7.62 | C57B1/6               | 2           | 0.78                               |
| Effective molarity(M l <sup>-1</sup> )            | 1 | 8.84 | C57/Bl6               | 1           | 0.78                               |
| Activity(milliequivalent /kg)                     | 1 | 8.84 | ATCC 25923            | 1           | 0.78                               |
| Relative peroxidation(%)                          | 1 | 8.84 | 1199B                 | 2           | 0.78                               |
| Q1/2(mM)                                          | 1 | 8.84 | MN8                   | 3           | 1.32                               |
| Activity(microM/min/mg)                           | 1 | 8.84 | Can2                  | 1           | 0.97                               |
| RC10(uM)                                          | 1 | 8.84 |                       |             |                                    |
| Activity(uM/L)                                    | 1 | 8.84 |                       |             |                                    |

|                                  |            |                     |                                                    |    |       |
|----------------------------------|------------|---------------------|----------------------------------------------------|----|-------|
| IC20(uM)                         | 1          | 8.84                | Nce103                                             | 1  | 0.97  |
| MIC95(ug ml-1)                   | 1          | 8.84                | DMY2844                                            | 1  | 0.97  |
| Activity(nM/min/mg)              | 1          | 8.84                | P55                                                | 1  | 2.01  |
| A0.5(uM)                         | 1          | 8.84                | H37Rv                                              | 2  | 2.01  |
| Activity(nmol/hr)                | 1          | 8.84                | 295/93                                             | 1  | 2.01  |
| LDL cholesterol(mg<br>100ml-1)   | 1          | 8.84                | NMRI                                               | 3  | 5.30  |
| HDL cholesterol(mg<br>100ml-1)   | 1          | 8.84                | DBA/1                                              | 6  | 5.20  |
| T inh(s)                         | 1          | 8.84                | Swiss                                              | 1  | 5.05  |
| Total cholesterol(mg<br>100ml-1) | 1          | 8.84                | Swiss albino                                       | 1  | 5.60  |
| Safety index(-)                  | 1          | 8.84                | CD1                                                | 13 | 5.63  |
| Activity(L/mol/s)                | 1          | 8.84                | ddY                                                | 2  | 5.70  |
| HMGR activity(-)                 | 1          | 8.84                | FVB                                                | 9  | 5.70  |
| IC50(ug)                         | 1          | 8.84                | CD-1                                               | 4  | 6.29  |
| Drug uptake(uM)                  | 1          | 8.92                | Dunkin Hartley                                     | 4  | 6.29  |
| Vmax/Km(pmol/micro<br>M)         | 1          | 8.92                | Wistar-Kyoto                                       | 4  | 6.59  |
| Vmax(pmol)                       | 1          | 8.92                | Malmsten CBS 483.76                                | 2  | -1.69 |
| Drug degradation(%)              | 1          | 9.06                | (Robin) Blanchard CBS<br>160.66                    | 2  | -1.69 |
| AC50(%)                          | 1          | 9.91                | T98                                                | 3  | -1.69 |
| $C_{2drug}$                      | $n_{drug}$ | $<ALOGP(C_{2drug})$ | (Hartz) Langeron and<br>Milochevitch CBS<br>358.93 | 2  | -1.69 |
| m.d.                             | 33972      | 3.33                | Malmsten CBS 459.61                                | 2  | -1.69 |
| CHO                              | 45         | 2.11                | Ajello CBS 495.70                                  | 2  | -1.69 |
| Vero                             | 17         | -1.40               | (Bodin) Guiart and<br>Grigorakis IHME 3999         | 1  | -1.69 |
| HeLa                             | 25         | 1.84                | TA98                                               | 1  | -1.69 |

|             |     |       |                         |             |                                    |
|-------------|-----|-------|-------------------------|-------------|------------------------------------|
| K562        | 28  | -0.94 | (Castellani) Sabouraud  | 2           | -1.69                              |
|             |     |       | IHME 4321               |             |                                    |
| HL-60       | 527 | 5.55  | MTCC 300                | 4           | 3.58                               |
| Raji        | 46  | 3.38  | ATCC 90113              | 1           | -1.69                              |
| U-251       | 6   | 3.00  | ATCC 90028              | 1           | -1.69                              |
| C6          | 1   | -1.69 | IMSS:0989:1             | 1           | -1.69                              |
| PC-12       | 3   | 5.33  | pdm09                   | 1           | -1.69                              |
| Platelet    | 5   | -1.72 | 4755                    | 5           | 2.21                               |
| RAW264.7    | 10  | 0.50  | K1                      | 1           | 0.18                               |
| MVLN        | 2   | -1.69 | MHOM/ET/67/L82          | 2           | 0.18                               |
| BV-2        | 4   | -1.69 | NMRI, BalbC or CD1 mice | 1           | 0.18                               |
| KB          | 4   | -0.87 | Tulahuen C4 (LacZ)      | 1           | 0.18                               |
| Hepatocyte  | 10  | 6.76  | STIB 900                | 1           | 0.18                               |
| HepG2       | 14  | 2.40  | Swiss Webster           | 1           | 1.61                               |
| MDCK        | 5   | 1.02  | KOP55                   | 3           | 2.01                               |
| HEK293      | 40  | 4.95  | K12 MG1655              | 1           | 2.01                               |
| Erythrocyte | 11  | 0.46  | LAC                     | 1           | 2.01                               |
| SH-SY5Y     | 6   | 0.56  | MW2                     | 1           | 2.01                               |
| Fibroblast  | 17  | 6.02  | MNPE                    | 1           | 2.01                               |
| RD          | 8   | 1.69  | CDC587                  | 1           | 2.01                               |
| L1210       | 12  | 0.56  | Fisher                  | 1           | 5.60                               |
| Sf9         | 10  | 4.82  | W2                      | 1           | 5.60                               |
| V79         | 7   | 7.57  | PQ37                    | 1           | 8.84                               |
| CCRF-CEM    | 9   | 3.16  | TA102                   | 4           | 8.84                               |
| HaCaT       | 30  | 4.04  | Sprague-Dawley Albino   | 1           | 8.84                               |
| BALB/3T3    | 1   | 0.61  | $C_{2drug}$             | $n_{jdrug}$ | $\langle ALOGP(C_{2drug}) \rangle$ |
| Oocyte      | 2   | -0.60 | CAL-62                  | 1           | 5.60                               |
| CHO-K1      | 16  | 1.99  | 769-P                   | 1           | 5.60                               |
| Adipocyte   | 4   | 0.78  | OAW-42                  | 1           | 5.60                               |

|            |    |      |             |   |      |
|------------|----|------|-------------|---|------|
| HCT-15     | 5  | 3.94 | PSN1        | 1 | 5.60 |
| MDA-MB-231 | 11 | 4.52 | SH-4        | 1 | 5.60 |
| SN12C      | 5  | 3.94 | NCI-H650    | 1 | 5.60 |
| SR         | 4  | 3.52 | NCI-H1703   | 1 | 5.60 |
| M14        | 5  | 3.94 | OCI-AML2    | 1 | 5.60 |
| A549       | 12 | 4.41 | SAOS-2      | 1 | 5.60 |
| ACHN       | 5  | 3.94 | ZR-75-30    | 1 | 5.60 |
| EKVX       | 4  | 3.52 | ES6         | 1 | 5.60 |
| KM12       | 5  | 3.94 | A704        | 1 | 5.60 |
| MCF7       | 63 | 5.42 | SW982       | 1 | 5.60 |
| PC-3       | 9  | 4.68 | COLO-741    | 1 | 5.60 |
| T47D       | 11 | 4.85 | OS-RC-2     | 1 | 5.60 |
| 786-0      | 5  | 3.94 | G-402       | 1 | 5.60 |
| HT-29      | 17 | 5.86 | KLE         | 1 | 5.60 |
| MDA-N      | 4  | 3.52 | NCI-H2228   | 1 | 5.60 |
| TK-10      | 4  | 3.55 | EC-GI-10    | 1 | 5.60 |
| UO-31      | 5  | 3.94 | OCUB-M      | 1 | 5.60 |
| CAKI-1     | 5  | 3.94 | EFM-19      | 1 | 5.60 |
| DU-145     | 11 | 4.23 | LB373-MEL-D | 1 | 5.60 |
| HOP-62     | 5  | 3.94 | CAL-33      | 1 | 5.60 |
| HOP-92     | 4  | 3.55 | 8505C       | 1 | 5.60 |
| MOLT-4     | 6  | 3.28 | NCI-H1792   | 1 | 5.60 |
| SF-268     | 5  | 3.94 | SBC-5       | 1 | 5.60 |
| SF-295     | 4  | 3.52 | IST-MEL1    | 1 | 5.60 |
| SF-539     | 4  | 3.52 | SW1088      | 1 | 5.60 |
| SNB-19     | 4  | 3.52 | HCC1569     | 1 | 5.60 |
| SNB-75     | 4  | 3.52 | MHH-NB-11   | 1 | 5.60 |
| SW-620     | 4  | 3.52 | ES7         | 1 | 5.60 |
| HCT-116    | 6  | 4.26 | HN          | 1 | 5.60 |
| Hs-578T    | 3  | 2.86 | LB771-HNC   | 1 | 5.60 |

|             |    |      |                    |   |      |
|-------------|----|------|--------------------|---|------|
| IGROV-1     | 5  | 3.94 | RH-18              | 1 | 5.60 |
| NCI-H23     | 5  | 3.94 | HuP-T4             | 1 | 5.60 |
| OVCAR-3     | 5  | 3.94 | LoVo               | 1 | 5.60 |
| OVCAR-4     | 5  | 3.94 | MFM-223            | 1 | 5.60 |
| OVCAR-5     | 5  | 3.94 | RKO                | 1 | 5.60 |
| OVCAR-8     | 4  | 3.55 | D-336MG            | 1 | 5.60 |
| COLO 205    | 5  | 3.94 | HCC70              | 1 | 5.60 |
| HCC 2998    | 4  | 3.52 | KYSE-520 cell line | 1 | 5.60 |
| LOX IMVI    | 4  | 3.52 | NCI-H358           | 1 | 5.60 |
| Malme-3M    | 4  | 3.52 | NCI-H1838          | 1 | 5.60 |
| NCI-H226    | 5  | 3.94 | NCI-H1573          | 1 | 5.60 |
| NCI-H460    | 5  | 3.94 | KARPAS-299         | 1 | 5.60 |
| NCI-H522    | 4  | 3.52 | LB2518-MEL         | 1 | 5.60 |
| SK-MEL-2    | 5  | 3.94 | NCI-H1793          | 1 | 5.60 |
| SK-MEL-5    | 4  | 3.52 | HDLM-2             | 1 | 5.60 |
| UACC-257    | 5  | 3.94 | NCI-H28            | 1 | 5.60 |
| NCI-H322M   | 4  | 3.52 | SNU-449            | 1 | 5.60 |
| RPMI-8226   | 4  | 3.55 | DOK                | 1 | 5.60 |
| SK-MEL-28   | 5  | 3.94 | Lu-65              | 1 | 5.60 |
| MDA-MB-435  | 4  | 3.52 | VMRC-RCZ           | 1 | 5.60 |
| NCI/ADR-RES | 5  | 4.16 | H4                 | 1 | 5.60 |
| HT-22       | 16 | 7.57 | D-247MG            | 1 | 5.60 |
| UACC-62     | 4  | 4.68 | HGC-27             | 1 | 5.60 |
| BT-549      | 3  | 4.40 | WM-115             | 1 | 5.60 |
| SK-OV-3     | 4  | 4.68 | SK-N-FI            | 1 | 5.60 |
| RXF 393     | 3  | 4.37 | NCI-H2030          | 1 | 5.60 |
| A498        | 4  | 4.68 | J82                | 1 | 5.60 |
| MG-63       | 10 | 5.08 | KYSE-270           | 1 | 5.60 |
| COS-7       | 55 | 5.48 | SW900              | 1 | 5.60 |
| Jurkat      | 4  | 5.31 | ES1                | 1 | 5.60 |

|                 |    |      |                 |   |      |
|-----------------|----|------|-----------------|---|------|
| Keratinocyte    | 11 | 4.01 | D-502MG         | 1 | 5.60 |
| Caco-2          | 20 | 5.65 | HMV-2 cell line | 1 | 5.60 |
| Splenocyte      | 6  | 5.20 | LU-99A          | 1 | 5.60 |
| PBMC            | 32 | 5.93 | TE-8            | 1 | 5.60 |
| THP-1           | 15 | 6.47 | BEN             | 1 | 5.60 |
| Osteoclast-like | 16 | 6.89 | KURAMOCHI       | 1 | 5.60 |
| F9              | 6  | 5.60 | KNS-62          | 1 | 5.60 |
| CV-1            | 54 | 5.60 | Ca-Ski          | 1 | 5.60 |
| SK-BR-3         | 4  | 5.60 | SW1573          | 1 | 5.60 |
| LNCaP           | 8  | 5.92 | SW 954          | 1 | 5.60 |
| HEK-293T        | 26 | 4.33 | A-375           | 1 | 5.60 |
| NIH3T3          | 8  | 5.60 | A101D           | 1 | 5.60 |
| NB-4            | 5  | 5.60 | LCLC-97TM1      | 1 | 5.60 |
| COS-1           | 4  | 5.60 | COLO-800        | 1 | 5.60 |
| ATN-1           | 1  | 5.60 | NCI-H1048       | 1 | 5.60 |
| MDA-MB-453      | 2  | 5.60 | NCI-H1975       | 1 | 5.60 |
| MDA-MB-468      | 1  | 5.60 | MC116           | 1 | 5.60 |
| DLD-1           | 1  | 5.60 | EFO-21          | 1 | 5.60 |
| XF498           | 1  | 5.60 | NEC8            | 1 | 5.60 |
| HOP-18          | 1  | 5.60 | CGTH-W-1        | 1 | 5.60 |
| SNB-78          | 1  | 5.60 | CAL-54          | 1 | 5.60 |
| DMS-114         | 2  | 5.60 | SNU-5           | 1 | 5.60 |
| DMS-273         | 2  | 5.60 | HCC1187         | 1 | 5.60 |
| KM-20L2         | 1  | 5.60 | SiHa            | 1 | 5.60 |
| M19-MEL         | 1  | 5.60 | MHH-PREB-1      | 1 | 5.60 |
| RXF 631         | 1  | 5.60 | NCI-H2170       | 1 | 5.60 |
| LXFL 529        | 1  | 5.60 | SJRH30          | 1 | 5.60 |
| HOS             | 3  | 5.67 | D-392MG         | 1 | 5.60 |
| T-cell          | 1  | 5.70 | NCI-H510A       | 1 | 5.60 |
| Huh-7           | 3  | 5.67 | TE-9            | 1 | 5.60 |

|                                        |    |       |                |   |      |
|----------------------------------------|----|-------|----------------|---|------|
| Bone marrow cell                       | 4  | 2.83  | SW780          | 1 | 5.60 |
| RWLeu4                                 | 1  | 5.70  | OE19           | 1 | 5.60 |
| U-937                                  | 14 | 6.62  | LN-405         | 1 | 5.60 |
| Keratinocyte cell line                 | 2  | 5.70  | ES5            | 1 | 5.60 |
| PE                                     | 1  | 5.70  | KYSE-140       | 1 | 5.60 |
| C3H 10T1/2                             | 1  | 5.70  | KP-N-YN        | 1 | 5.60 |
| SW480                                  | 19 | 4.08  | KM-H2          | 1 | 5.60 |
| HMEC                                   | 2  | 8.84  | NCI-H1651      | 1 | 5.60 |
| Lymphoblastoid cell                    | 64 | 6.37  | TE-6           | 1 | 5.60 |
| Monocyte                               | 1  | -1.69 | C2BBel         | 1 | 5.60 |
| L929                                   | 3  | -1.69 | SKG-IIIa       | 1 | 5.60 |
| B16                                    | 2  | -1.41 | SW1463         | 1 | 5.60 |
| 3T3                                    | 2  | -0.35 | NCI-H1650      | 1 | 5.60 |
| NCI-H716                               | 1  | 0.18  | ETK-1          | 1 | 5.60 |
| Macrophage                             | 1  | 0.18  | D-263MG        | 1 | 5.60 |
| L6                                     | 1  | 0.18  | NCI-H1395      | 1 | 5.60 |
| CHRC5 cell line                        | 1  | 1.77  | KU-19-19       | 1 | 5.60 |
| A2780                                  | 2  | 3.81  | COLO-680N      | 1 | 5.60 |
| MIA PaCa-2                             | 5  | 4.88  | DSH1           | 1 | 5.60 |
| A2058                                  | 2  | 3.81  | FTC-133        | 1 | 5.60 |
| SAS                                    | 2  | 3.81  | MDA-MB-415     | 1 | 5.60 |
| C2C12                                  | 2  | 2.56  | SNU-387        | 1 | 5.60 |
| Osteoblast                             | 1  | 2.97  | NCI-H1437      | 1 | 5.60 |
| RBL-2H3                                | 1  | 4.62  | G-401          | 1 | 5.60 |
| Panel NCI-60 (60 carcinoma cell lines) | 1  | 5.51  | GCT            | 1 | 5.60 |
| Panel leukemia (Carcinoma cell lines)  | 1  | 5.60  | MDA-MB-175-VII | 1 | 5.60 |
| S91                                    | 1  | 5.60  | IGR-1          | 1 | 5.60 |
| ZR-75-1                                | 1  | 5.60  | CAL-27         | 1 | 5.60 |

|                 |   |      |                   |   |      |
|-----------------|---|------|-------------------|---|------|
| P19             | 1 | 5.60 | YKG-1             | 1 | 5.60 |
| MC-IXC          | 1 | 5.60 | BT-20             | 1 | 5.60 |
| HH              | 1 | 5.60 | GMS-10            | 1 | 5.60 |
| Neuron          | 1 | 5.60 | NCI-H446          | 1 | 5.60 |
| NB13            | 1 | 5.60 | GAK               | 1 | 5.60 |
| D283 Med        | 1 | 5.60 | NCI-H1693         | 1 | 5.60 |
| EW-3            | 1 | 5.60 | NCI-H1355         | 1 | 5.60 |
| KU812 cell line | 1 | 5.60 | HSC-2             | 1 | 5.60 |
| SK-NEP-1        | 1 | 5.60 | Calu-3            | 1 | 5.60 |
| HCC1806         | 1 | 5.60 | NCI-H2452         | 1 | 5.60 |
| HuO-3N1         | 1 | 5.60 | SW684             | 1 | 5.60 |
| CTV-1           | 1 | 5.60 | NCI-H2122         | 1 | 5.60 |
| LAMA-84         | 1 | 5.60 | SW837             | 1 | 5.60 |
| NCI-H720        | 1 | 5.60 | HAL-01            | 1 | 5.60 |
| MOLT-13         | 1 | 5.60 | NCI-H596          | 1 | 5.60 |
| JVM-2           | 1 | 5.60 | HTC-C3            | 1 | 5.60 |
| NBsusSR         | 1 | 5.60 | OE33              | 1 | 5.60 |
| BV-173          | 1 | 5.60 | SCC-25            | 1 | 5.60 |
| CTB-1           | 1 | 5.60 | HT                | 1 | 5.60 |
| ACN             | 1 | 5.60 | T98G              | 1 | 5.60 |
| L-363           | 1 | 5.60 | 647-V             | 1 | 5.60 |
| NCI-H69         | 1 | 5.60 | Capan-2           | 1 | 5.60 |
| ECC10           | 1 | 5.60 | CAL-39            | 1 | 5.60 |
| NCI-H209        | 1 | 5.60 | LXF-289 cell line | 1 | 5.60 |
| KARPAS-45       | 1 | 5.60 | NCI-N87           | 1 | 5.60 |
| COR-L88         | 1 | 5.60 | HCC1937           | 1 | 5.60 |
| U-266           | 1 | 5.60 | EFO-27            | 1 | 5.60 |
| RS4-11          | 1 | 5.60 | AN3-CA            | 1 | 5.60 |
| DB              | 1 | 5.60 | LB831-BLC         | 1 | 5.60 |
| EM-2            | 1 | 5.60 | CAL-12T           | 1 | 5.60 |



|              |   |      |            |   |      |
|--------------|---|------|------------|---|------|
| KY821        | 1 | 5.60 | NCI-H1666  | 1 | 5.60 |
| QIMR-WIL     | 1 | 5.60 | EW-22      | 1 | 5.60 |
| KYSE-180     | 1 | 5.60 | HCC1954    | 1 | 5.60 |
| ALL-PO       | 1 | 5.60 | HuP-T3     | 1 | 5.60 |
| NB14         | 1 | 5.60 | SCH        | 1 | 5.60 |
| BPH-1        | 1 | 5.60 | YAPC       | 1 | 5.60 |
| A3-KAW       | 1 | 5.60 | Panc1005   | 1 | 5.60 |
| EW-13        | 1 | 5.60 | JAR        | 1 | 5.60 |
| NCI-H526     | 1 | 5.60 | LC-2-ad    | 1 | 5.60 |
| NKM-1        | 1 | 5.60 | UMC-11     | 1 | 5.60 |
| SCC-15       | 1 | 5.60 | NB69       | 1 | 5.60 |
| MEG-01       | 1 | 5.60 | MZ1-PC     | 1 | 5.60 |
| NCI-H1648    | 1 | 5.60 | TE-12      | 1 | 5.60 |
| GP5d         | 1 | 5.60 | MMAC-SF    | 1 | 5.60 |
| HCC2218      | 1 | 5.60 | IST-MES1   | 1 | 5.60 |
| KE-37        | 1 | 5.60 | BB65-RCC   | 1 | 5.60 |
| CHP-212      | 1 | 5.60 | PANC-08-13 | 1 | 5.60 |
| NOMO-1       | 1 | 5.60 | NCI-H661   | 1 | 5.60 |
| NCI-H292     | 1 | 5.60 | TGBC11TKB  | 1 | 5.60 |
| MS-1         | 1 | 5.60 | ESS-1      | 1 | 5.60 |
| KMOE-2       | 1 | 5.60 | EW-24      | 1 | 5.60 |
| HCC1419      | 1 | 5.60 | Ca9-22     | 1 | 5.60 |
| NCI-H1092    | 1 | 5.60 | ES8        | 1 | 5.60 |
| DEL          | 1 | 5.60 | TE-10      | 1 | 5.60 |
| P12-Ichikawa | 1 | 5.60 | COR-L23    | 1 | 5.60 |
| NCI-H1770    | 1 | 5.60 | CAL-85-1   | 1 | 5.60 |
| NCI-H82      | 1 | 5.60 | LS-411N    | 1 | 5.60 |
| COLO-684     | 1 | 5.60 | 5637       | 1 | 5.60 |
| 697          | 1 | 5.60 | SK-UT-1    | 1 | 5.60 |
| HC-1         | 1 | 5.60 | BFTC-905   | 1 | 5.60 |

|                |   |      |            |   |      |
|----------------|---|------|------------|---|------|
| HSC-3          | 1 | 5.60 | SW1417     | 1 | 5.60 |
| ES3            | 1 | 5.60 | SK-MES-1   | 1 | 5.60 |
| HuO9           | 1 | 5.60 | PC-14      | 1 | 5.60 |
| ME-180         | 1 | 5.60 | TGBC1TKB   | 1 | 5.60 |
| KG-1           | 1 | 5.60 | OC-314     | 1 | 5.60 |
| OAW-28         | 1 | 5.60 | HPAF-II    | 1 | 5.60 |
| COLO-829       | 1 | 5.60 | SJSA-1     | 1 | 5.60 |
| SK-N-AS        | 1 | 5.60 | M059J      | 1 | 5.60 |
| KNS-42         | 1 | 5.60 | CaR-1      | 1 | 5.60 |
| SW13           | 1 | 5.60 | GCIY       | 1 | 5.60 |
| J-RT3-T3-5     | 1 | 5.60 | OMC-1      | 1 | 5.60 |
| KYSE-450       | 1 | 5.60 | KGN        | 1 | 5.60 |
| CHL-1          | 1 | 5.60 | GI-1       | 1 | 5.60 |
| UMUC3          | 1 | 5.60 | COLO-824   | 1 | 5.60 |
| JVM-3          | 1 | 5.60 | TE-1       | 1 | 5.60 |
| LB1047-RCC     | 1 | 5.60 | CAL-120    | 1 | 5.60 |
| LU-139         | 1 | 5.60 | COLO-668   | 1 | 5.60 |
| SK-MEL-1       | 1 | 5.60 | Becker     | 1 | 5.60 |
| SK-MEL-24      | 1 | 5.60 | BCPAP      | 1 | 5.60 |
| A4-Fuk         | 1 | 5.60 | LB2241-RCC | 1 | 5.60 |
| CAMA-1         | 1 | 5.60 | C8166      | 1 | 5.60 |
| NCI-H1623      | 1 | 5.60 | BT-474     | 1 | 5.60 |
| A673           | 1 | 5.60 | YH-13      | 1 | 5.60 |
| Ramos-2G6-4C10 | 1 | 5.60 | NCI-H2342  | 1 | 5.60 |
| DOHH-2         | 1 | 5.60 | NB17       | 1 | 5.60 |
| DoTc2-4510     | 1 | 5.60 | NCI-H630   | 1 | 5.60 |
| NTERA-2-cl-D1  | 1 | 5.60 | SW756      | 1 | 5.60 |
| 3LLD122        | 1 | 5.60 | NCI-H1993  | 1 | 5.60 |
| MeWo           | 1 | 5.60 | BHY        | 1 | 5.60 |
| BALL-1         | 1 | 5.60 | VA-ES-BJ   | 1 | 5.60 |

|                     |   |      |           |   |      |
|---------------------|---|------|-----------|---|------|
| A204                | 1 | 5.60 | CW-2      | 1 | 5.60 |
| KYSE-510            | 1 | 5.60 | HT-1080   | 1 | 5.60 |
| MSTO-211H           | 1 | 5.60 | NCI-H1581 | 1 | 5.60 |
| SK-LU-1             | 1 | 5.60 | D-423MG   | 1 | 5.60 |
| EGI-1               | 1 | 5.60 | K5        | 1 | 5.60 |
| RH-1                | 1 | 5.60 | RVH-421   | 1 | 5.60 |
| LU-134-A            | 1 | 5.60 | SNU-C2B   | 1 | 5.60 |
| KS-1                | 1 | 5.60 | SW48      | 1 | 5.60 |
| GAMG                | 1 | 5.60 | HEC-1     | 1 | 5.60 |
| TE-5                | 1 | 5.60 | EW-1      | 1 | 5.60 |
| P30-OHK             | 1 | 5.60 | NCI-H747  | 1 | 5.60 |
| GOTO                | 1 | 5.60 | NCI-H727  | 1 | 5.60 |
| Calu-6              | 1 | 5.60 | NH-12     | 1 | 5.60 |
| KYSE-410            | 1 | 5.60 | KP-N-YS   | 1 | 5.60 |
| CAL-72              | 1 | 5.60 | MFE-280   | 1 | 5.60 |
| AM-38               | 1 | 5.60 | H-EMC-SS  | 1 | 5.60 |
| 23132-87            | 1 | 5.60 | ONS-76    | 1 | 5.60 |
| SCC-4               | 1 | 5.60 | 639-V     | 1 | 5.60 |
| LU-135              | 1 | 5.60 | T84       | 1 | 5.60 |
| NB10                | 1 | 5.60 | 8-MG-BA   | 1 | 5.60 |
| NB7                 | 1 | 5.60 | RO82-W-1  | 1 | 5.60 |
| RPMI-7951           | 1 | 5.60 | HT-144    | 1 | 5.60 |
| AU565               | 1 | 5.60 | NCI-H2087 | 1 | 5.60 |
| HCE-4               | 1 | 5.60 | SW1990    | 1 | 5.60 |
| BE-13               | 1 | 5.60 | SW948     | 1 | 5.60 |
| LCLC-103H cell line | 1 | 5.60 | SK-MEL-30 | 1 | 5.60 |
| NCI-H2126           | 1 | 5.60 | NB6       | 1 | 5.60 |
| PA-1                | 1 | 5.60 | NCI-H1299 | 1 | 5.60 |
| HSC-4               | 1 | 5.60 | ABC-1     | 1 | 5.60 |
| DMS-79              | 1 | 5.60 | IA-LM     | 1 | 5.60 |

|            |   |      |                    |   |      |
|------------|---|------|--------------------|---|------|
| NOS-1      | 1 | 5.60 | 8305C              | 1 | 5.60 |
| U-118-MG   | 1 | 5.60 | MFH-ino            | 1 | 5.60 |
| Daoy       | 6 | 7.28 | Detroit 562        | 1 | 5.60 |
| SBC-1      | 1 | 5.60 | LAN-6              | 1 | 5.60 |
| CAL-51     | 1 | 5.60 | KYSE-70 cell line  | 1 | 5.60 |
| NY         | 1 | 5.60 | TI-73              | 1 | 5.60 |
| BXPC-3     | 1 | 5.60 | T-24               | 1 | 5.60 |
| MOLT-16    | 1 | 5.60 | NCI-H810           | 1 | 5.60 |
| NCI-H1155  | 1 | 5.60 | COLO-679           | 1 | 5.60 |
| HO-1-N-1   | 1 | 5.60 | A-427              | 1 | 5.60 |
| CAPAN-1    | 1 | 5.60 | COR-L105           | 1 | 5.60 |
| CP50-MEL-B | 1 | 5.60 | NCI-H520           | 1 | 5.60 |
| RERF-LC-MS | 1 | 5.60 | CP66-MEL           | 1 | 5.60 |
| UACC-893   | 1 | 5.60 | SW626              | 1 | 5.60 |
| MPP-89     | 1 | 5.60 | DK-MG              | 1 | 5.60 |
| HCE-T      | 1 | 5.60 | KYSE-150 cell line | 1 | 5.60 |
| FaDu       | 1 | 5.60 | S-117              | 1 | 5.60 |
| D-542MG    | 1 | 5.60 | NCI-H1563          | 1 | 5.60 |
| MEL-HO     | 1 | 5.60 | KINGS-1            | 1 | 5.60 |
| KNS-81-FD  | 1 | 5.60 | MZ7-mel            | 1 | 5.60 |
| G-361      | 1 | 5.60 | HLE                | 1 | 5.60 |
| NCI-H2009  | 1 | 5.60 | SK-PN-DW           | 1 | 5.60 |
| BFTC-909   | 1 | 5.60 | NCI-H1755          | 1 | 5.60 |
| AGS        | 1 | 5.60 | BB49-HNC           | 1 | 5.60 |
| CFPAC-1    | 1 | 5.60 | SCC-9              | 1 | 5.60 |
| VM-CUB-1   | 1 | 5.60 | HT55               | 1 | 5.60 |
| EW-18      | 1 | 5.60 | HCC38              | 1 | 5.60 |
| ChaGo-K-1  | 1 | 5.60 | NMC-G1             | 1 | 5.60 |
| TCC-SUP    | 1 | 5.60 | LS-513             | 1 | 5.60 |
| KOSC-2     | 1 | 5.60 | NCI-H2052          | 1 | 5.60 |

|              |   |      |                 |   |      |
|--------------|---|------|-----------------|---|------|
| GI-ME-N      | 1 | 5.60 | MEL-JUSO        | 1 | 5.60 |
| DJM-1        | 1 | 5.60 | COLO-678        | 1 | 5.60 |
| NCI-H1304    | 1 | 5.60 | CWR22R          | 1 | 5.60 |
| HT-3         | 1 | 5.60 | SW872           | 1 | 5.60 |
| RT-112       | 1 | 5.60 | LNCaP-Clone-FGC | 1 | 5.60 |
| C-33-A       | 1 | 5.60 | RPMI-2650       | 1 | 5.60 |
| EW-11        | 1 | 5.60 | LS-123          | 1 | 5.60 |
| KP-4         | 1 | 5.60 | no-11           | 1 | 5.60 |
| SNU-423      | 1 | 5.60 | NB12            | 1 | 5.60 |
| RPMI-8866    | 1 | 5.60 | SK-LMS-1        | 1 | 5.60 |
| SNU1         | 1 | 5.60 | IST-SL1         | 1 | 5.60 |
| DU-4475      | 1 | 5.60 | EPLC-272H       | 1 | 5.60 |
| D-566MG      | 1 | 5.60 | NCI-H2347       | 1 | 5.60 |
| PFSK-1       | 1 | 5.60 | SW1783          | 1 | 5.60 |
| MDA-MB-361   | 1 | 5.60 | U-87 MG         | 1 | 5.60 |
| HT-1376      | 1 | 5.60 | PANC-03-27      | 1 | 5.60 |
| HD-MY-Z      | 1 | 5.60 | TYK-nu          | 1 | 5.60 |
| SW1710       | 1 | 5.60 | no-10           | 1 | 5.60 |
| KALS-1       | 1 | 5.60 | C3A             | 1 | 5.60 |
| HEL          | 1 | 5.60 | A388            | 1 | 5.60 |
| DBTRG-05MG   | 1 | 5.60 | NCI-H2029       | 1 | 5.60 |
| GB-1         | 1 | 5.60 | LK-2            | 1 | 5.60 |
| TE-11        | 1 | 5.60 | BHT-101         | 1 | 5.60 |
| NB5          | 1 | 5.60 | NCI-H2405       | 1 | 5.60 |
| NUGC-3       | 1 | 5.60 | LS-1034         | 1 | 5.60 |
| COLO-320-HSR | 1 | 5.60 | BB30-HNC        | 1 | 5.60 |
| ES4          | 1 | 5.60 | C32             | 1 | 5.60 |
| A-431        | 2 | 7.22 | NCI-H2291       | 1 | 5.60 |
| TGBC24TKB    | 1 | 5.60 | RMG-I           | 1 | 5.60 |
| GT3TKB       | 1 | 5.60 | CAS-1           | 1 | 5.60 |

|          |   |      |                                     |   |      |
|----------|---|------|-------------------------------------|---|------|
| COLO-792 | 1 | 5.60 | JEG-3                               | 1 | 5.60 |
| NCI-H441 | 1 | 5.60 | MLMA                                | 1 | 5.60 |
| MZ2-MEL  | 1 | 5.60 | RCC10RGB                            | 1 | 5.60 |
| EW-16    | 1 | 5.60 | HCC1395                             | 1 | 5.60 |
| GR-ST    | 1 | 5.60 | Murine-murine<br>hybridoma (mark 3) | 1 | 8.84 |
| MHH-ES-1 | 1 | 5.60 | HUVEC                               | 2 | 8.84 |
| SK-N-DZ  | 1 | 5.60 | SNU-C1                              | 1 | 8.84 |
| L-428    | 1 | 5.60 | MT4                                 | 1 | 8.84 |
| RCM-1    | 1 | 5.60 | J774                                | 1 | 8.84 |
| MN-60    | 1 | 5.60 | MDA-MB-157                          | 1 | 5.60 |
